# Supplementary material for: Monocytic THP-1 cells diverge significantly from their primary counterparts: a comparative examination of the chromosomal conformations and transcriptomes
Source: Hereditas. 2021 Nov 5;158:43. doi: 10.1186/s41065-021-00205-w (PMC8569982; doi:10.1186/s41065-021-00205-w)
Supplement: Supplementary file 2 — Additional file 2. [file 41065_2021_205_MOESM2_ESM.xlsx]

## Sheet: mono_THP-1_a2b
Category	Term		Count	%	PValue	Genes	List Total	Pop Hits	Pop Total	Fold Enrichment	Bonferroni	Benjamini	FDR
GOTERM_BP_DIRECT	GO:0060337	type I interferon signaling pathway	19	0.74103	0.00014499	ENSG00000172183, ENSG00000187608, ENSG00000157601, ENSG00000204525, ENSG00000171855, ENSG00000117595, ENSG00000142166, ENSG00000126709, ENSG00000137265, ENSG00000204642, ENSG00000206503, ENSG00000234745, ENSG00000204632, ENSG00000159110, ENSG00000162645, ENSG00000147873, ENSG00000183486, ENSG00000126456, ENSG00000162434	1866	64	16792	2.67156	0.506674	0.706534	0.706534
GOTERM_BP_DIRECT	GO:0035196	production of miRNAs involved in gene silencing by miRNA	6	0.234009	0.00070495	ENSG00000100697, ENSG00000163877, ENSG00000126070, ENSG00000092847, ENSG00000134698, ENSG00000180228	1866	8	16792	6.7492	0.967821	1	1
GOTERM_BP_DIRECT	GO:0051607	defense response to virus	33	1.28705	0.00116318	ENSG00000240247, ENSG00000187608, ENSG00000197110, ENSG00000137628, ENSG00000183709, ENSG00000081237, ENSG00000113356, ENSG00000132274, ENSG00000132256, ENSG00000171855, ENSG00000142166, ENSG00000187796, ENSG00000159110, ENSG00000142748, ENSG00000147873, ENSG00000176171, ENSG00000185436, ENSG00000126456, ENSG00000172183, ENSG00000104972, ENSG00000132824, ENSG00000077348, ENSG00000243646, ENSG0000…	1866	165	16792	1.79979	0.996557	1	1
GOTERM_BP_DIRECT	GO:0000956	nuclear-transcribed mRNA catabolic process	7	0.273011	0.00159869	ENSG00000053372, ENSG00000171824, ENSG00000134815, ENSG00000151779, ENSG00000092847, ENSG00000054118, ENSG00000106355	1866	13	16792	4.84558	0.999589	1	1
GOTERM_BP_DIRECT	GO:0060333	interferon-gamma-mediated signaling pathway	18	0.702028	0.00163426	ENSG00000149294, ENSG00000132109, ENSG00000116525, ENSG00000117228, ENSG00000132274, ENSG00000159128, ENSG00000132256, ENSG00000204525, ENSG00000117595, ENSG00000137265, ENSG00000204642, ENSG00000206503, ENSG00000234745, ENSG00000204632, ENSG00000162645, ENSG00000234127, ENSG00000126456, ENSG00000162434	1866	71	16792	2.28142	0.999654	1	1
GOTERM_BP_DIRECT	GO:0006915	apoptotic process	86	3.35413	0.00241665	ENSG00000049249, ENSG00000092871, ENSG00000104228, ENSG00000130758, ENSG00000135960, ENSG00000001460, ENSG00000116688, ENSG00000082397, ENSG00000138794, ENSG00000082512, ENSG00000081189, ENSG00000204599, ENSG00000087088, ENSG00000179021, ENSG00000126453, ENSG00000111707, ENSG00000105198, ENSG00000126456, ENSG00000145335, ENSG00000106952, ENSG00000176641, ENSG00000114416, ENSG00000115107, ENSG0000…	1866	567	16792	1.36492	0.999992	1	1
GOTERM_BP_DIRECT	GO:0002479	antigen processing and presentation of exogenous peptide antigen via MHC class I, TAP-dependent	16	0.624025	0.00317709	ENSG00000135218, ENSG00000101182, ENSG00000126067, ENSG00000138448, ENSG00000099341, ENSG00000204525, ENSG00000204642, ENSG00000206503, ENSG00000234745, ENSG00000101843, ENSG00000204632, ENSG00000013275, ENSG00000108671, ENSG00000161057, ENSG00000163636, ENSG00000103035	1866	63	16792	2.28544	1	1	1
GOTERM_BP_DIRECT	GO:0050830	defense response to Gram-positive bacterium	19	0.74103	0.00507087	ENSG00000240247, ENSG00000160339, ENSG00000135218, ENSG00000104312, ENSG00000106952, ENSG00000206047, ENSG00000008438, ENSG00000142192, ENSG00000135077, ENSG00000157873, ENSG00000179954, ENSG00000197405, ENSG00000110680, ENSG00000197903, ENSG00000213809, ENSG00000206503, ENSG00000187796, ENSG00000142627, ENSG00000000938	1866	85	16792	2.01153	1	1	1
GOTERM_BP_DIRECT	GO:0032722	positive regulation of chemokine production	7	0.273011	0.00780052	ENSG00000126262, ENSG00000164342, ENSG00000136869, ENSG00000104312, ENSG00000100644, ENSG00000185897, ENSG00000135077	1866	17	16792	3.70544	1	1	1
GOTERM_BP_DIRECT	GO:0002385	mucosal immune response	4	0.156006	0.0115057	ENSG00000126262, ENSG00000183709, ENSG00000185897, ENSG00000185436	1866	5	16792	7.19914	1	1	1
GOTERM_BP_DIRECT	GO:0048515	spermatid differentiation	4	0.156006	0.0115057	ENSG00000144468, ENSG00000183160, ENSG00000144061, ENSG00000087088	1866	5	16792	7.19914	1	1	1
GOTERM_BP_DIRECT	GO:0002480	antigen processing and presentation of exogenous peptide antigen via MHC class I, TAP-independent	5	0.195008	0.0120645	ENSG00000204525, ENSG00000204642, ENSG00000206503, ENSG00000234745, ENSG00000204632	1866	9	16792	4.9994	1	1	1
GOTERM_BP_DIRECT	GO:0070206	protein trimerization	5	0.195008	0.0120645	ENSG00000204713, ENSG00000121236, ENSG00000132109, ENSG00000132274, ENSG00000132256	1866	9	16792	4.9994	1	1	1
GOTERM_BP_DIRECT	GO:0045087	innate immune response	64	2.4961	0.0131401	ENSG00000154124, ENSG00000196083, ENSG00000240247, ENSG00000104228, ENSG00000137628, ENSG00000135046, ENSG00000116525, ENSG00000159339, ENSG00000173369, ENSG00000132256, ENSG00000204713, ENSG00000205809, ENSG00000234127, ENSG00000147873, ENSG00000167601, ENSG00000162434, ENSG00000136869, ENSG00000154079, ENSG00000132824, ENSG00000132109, ENSG00000019169, ENSG00000173372, ENSG00000104856, ENSG0000…	1866	430	16792	1.33938	1	1	1
GOTERM_BP_DIRECT	GO:0009791	post-embryonic development	16	0.624025	0.0131613	ENSG00000153234, ENSG00000107679, ENSG00000104884, ENSG00000144290, ENSG00000146085, ENSG00000198793, ENSG00000075223, ENSG00000159256, ENSG00000150995, ENSG00000122729, ENSG00000171310, ENSG00000112294, ENSG00000107485, ENSG00000197081, ENSG00000104881, ENSG00000104331	1866	73	16792	1.97237	1	1	1
GOTERM_BP_DIRECT	GO:0070584	mitochondrion morphogenesis	7	0.273011	0.0140887	ENSG00000105357, ENSG00000106028, ENSG00000087088, ENSG00000145494, ENSG00000168958, ENSG00000171552, ENSG00000125741	1866	19	16792	3.31539	1	1	1
GOTERM_BP_DIRECT	GO:0006397	mRNA processing	31	1.20905	0.0140953	ENSG00000102081, ENSG00000104824, ENSG00000167281, ENSG00000170892, ENSG00000120948, ENSG00000151657, ENSG00000111196, ENSG00000185272, ENSG00000116560, ENSG00000136450, ENSG00000088930, ENSG00000181817, ENSG00000183431, ENSG00000126461, ENSG00000104852, ENSG00000048740, ENSG00000112531, ENSG00000076650, ENSG00000104859, ENSG00000213516, ENSG00000153006, ENSG00000175756, ENSG00000139793, ENSG0000…	1866	179	16792	1.55847	1	1	1
GOTERM_BP_DIRECT	GO:0001975	response to amphetamine	9	0.351014	0.0173611	ENSG00000142168, ENSG00000153234, ENSG00000153201, ENSG00000196591, ENSG00000169676, ENSG00000160014, ENSG00000188822, ENSG00000048052, ENSG00000180914	1866	31	16792	2.61259	1	1	1
GOTERM_BP_DIRECT	GO:0009615	response to virus	21	0.819033	0.0179263	ENSG00000172183, ENSG00000105323, ENSG00000104972, ENSG00000105810, ENSG00000137628, ENSG00000134419, ENSG00000132274, ENSG00000159128, ENSG00000115267, ENSG00000174953, ENSG00000157601, ENSG00000171855, ENSG00000142166, ENSG00000079785, ENSG00000081189, ENSG00000159110, ENSG00000123685, ENSG00000000938, ENSG00000183486, ENSG00000107485, ENSG00000180228	1866	110	16792	1.71798	1	1	1
GOTERM_BP_DIRECT	GO:0002430	complement receptor mediated signaling pathway	5	0.195008	0.0183615	ENSG00000203710, ENSG00000117322, ENSG00000112293, ENSG00000134830, ENSG00000142511	1866	10	16792	4.49946	1	1	1
GOTERM_BP_DIRECT	GO:0033151	V(D)J recombination	5	0.195008	0.0183615	ENSG00000175097, ENSG00000005156, ENSG00000174405, ENSG00000166349, ENSG00000105486	1866	10	16792	4.49946	1	1	1
GOTERM_BP_DIRECT	GO:0032508	DNA duplex unwinding	11	0.429017	0.0202327	ENSG00000183207, ENSG00000112118, ENSG00000079785, ENSG00000112249, ENSG00000085224, ENSG00000145907, ENSG00000135046, ENSG00000153922, ENSG00000100297, ENSG00000128513, ENSG00000104320	1866	44	16792	2.24973	1	1	1
GOTERM_BP_DIRECT	GO:0000381	regulation of alternative mRNA splicing, via spliceosome	10	0.390016	0.0208391	ENSG00000139793, ENSG00000185272, ENSG00000102081, ENSG00000124193, ENSG00000104824, ENSG00000157540, ENSG00000167281, ENSG00000076053, ENSG00000054118, ENSG00000146457	1866	38	16792	2.36814	1	1	1
GOTERM_BP_DIRECT	GO:0042796	snRNA transcription from RNA polymerase III promoter	4	0.156006	0.0211205	ENSG00000165684, ENSG00000164151, ENSG00000128915, ENSG00000023608	1866	6	16792	5.99929	1	1	1
GOTERM_BP_DIRECT	GO:0031584	activation of phospholipase D activity	4	0.156006	0.0211205	ENSG00000121905, ENSG00000120805, ENSG00000120063, ENSG00000067606	1866	6	16792	5.99929	1	1	1
GOTERM_BP_DIRECT	GO:0002250	adaptive immune response	26	1.01404	0.0214648	ENSG00000186818, ENSG00000239998, ENSG00000130038, ENSG00000135046, ENSG00000131042, ENSG00000170017, ENSG00000171855, ENSG00000244482, ENSG00000120899, ENSG00000204577, ENSG00000130529, ENSG00000147873, ENSG00000104972, ENSG00000104312, ENSG00000105369, ENSG00000104974, ENSG00000116514, ENSG00000135077, ENSG00000105609, ENSG00000113263, ENSG00000213809, ENSG00000166501, ENSG00000105287, ENSG0000…	1866	148	16792	1.58089	1	1	1
GOTERM_BP_DIRECT	GO:0070125	mitochondrial translational elongation	17	0.663027	0.0237259	ENSG00000259494, ENSG00000090263, ENSG00000181991, ENSG00000242485, ENSG00000082515, ENSG00000171421, ENSG00000116898, ENSG00000135972, ENSG00000136522, ENSG00000175756, ENSG00000115364, ENSG00000144029, ENSG00000154719, ENSG00000128626, ENSG00000147586, ENSG00000168827, ENSG00000243927	1866	85	16792	1.79979	1	1	1
GOTERM_BP_DIRECT	GO:0032728	positive regulation of interferon-beta production	8	0.312012	0.0248089	ENSG00000164342, ENSG00000136869, ENSG00000142166, ENSG00000104312, ENSG00000113356, ENSG00000126456, ENSG00000115267, ENSG00000181722	1866	27	16792	2.66635	1	1	1
GOTERM_BP_DIRECT	GO:0070126	mitochondrial translational termination	17	0.663027	0.0262455	ENSG00000259494, ENSG00000090263, ENSG00000181991, ENSG00000242485, ENSG00000082515, ENSG00000171421, ENSG00000116898, ENSG00000135972, ENSG00000136522, ENSG00000175756, ENSG00000115364, ENSG00000144029, ENSG00000112031, ENSG00000154719, ENSG00000128626, ENSG00000147586, ENSG00000243927	1866	86	16792	1.77886	1	1	1
GOTERM_BP_DIRECT	GO:0008380	RNA splicing	28	1.09204	0.0271835	ENSG00000108848, ENSG00000102081, ENSG00000174891, ENSG00000167281, ENSG00000120948, ENSG00000111196, ENSG00000075292, ENSG00000060688, ENSG00000185272, ENSG00000116560, ENSG00000181817, ENSG00000125743, ENSG00000183431, ENSG00000051596, ENSG00000126461, ENSG00000104852, ENSG00000112531, ENSG00000116954, ENSG00000104859, ENSG00000213516, ENSG00000153006, ENSG00000139793, ENSG00000084463, ENSG0000…	1866	166	16792	1.51789	1	1	1
GOTERM_BP_DIRECT	GO:0030218	erythrocyte differentiation	10	0.390016	0.0285983	ENSG00000144659, ENSG00000162769, ENSG00000123999, ENSG00000113658, ENSG00000105372, ENSG00000185811, ENSG00000164466, ENSG00000107485, ENSG00000105672, ENSG00000162367	1866	40	16792	2.24973	1	1	1
GOTERM_BP_DIRECT	GO:0035264	multicellular organism growth	16	0.624025	0.0288529	ENSG00000147050, ENSG00000196182, ENSG00000177565, ENSG00000107679, ENSG00000104884, ENSG00000144290, ENSG00000162769, ENSG00000198793, ENSG00000012061, ENSG00000142784, ENSG00000107282, ENSG00000085224, ENSG00000145494, ENSG00000070831, ENSG00000104881, ENSG00000087460	1866	80	16792	1.79979	1	1	1
GOTERM_BP_DIRECT	GO:0045859	regulation of protein kinase activity	9	0.351014	0.0296644	ENSG00000109911, ENSG00000142168, ENSG00000111725, ENSG00000198793, ENSG00000000938, ENSG00000114346, ENSG00000185104, ENSG00000070831, ENSG00000155657	1866	34	16792	2.38207	1	1	1
GOTERM_BP_DIRECT	GO:0090503	RNA phosphodiester bond hydrolysis, exonucleolytic	8	0.312012	0.0300015	ENSG00000172183, ENSG00000171824, ENSG00000077348, ENSG00000088930, ENSG00000155508, ENSG00000111596, ENSG00000110063, ENSG00000076043	1866	28	16792	2.57112	1	1	1
GOTERM_BP_DIRECT	GO:0043388	positive regulation of DNA binding	8	0.312012	0.0300015	ENSG00000157933, ENSG00000104884, ENSG00000137265, ENSG00000160014, ENSG00000068903, ENSG00000239672, ENSG00000011422, ENSG00000138798	1866	28	16792	2.57112	1	1	1
GOTERM_BP_DIRECT	GO:0006357	regulation of transcription from RNA polymerase II promoter	63	2.4571	0.0302762	ENSG00000109911, ENSG00000130751, ENSG00000180530, ENSG00000197056, ENSG00000178177, ENSG00000179222, ENSG00000198146, ENSG00000105516, ENSG00000111596, ENSG00000157554, ENSG00000114861, ENSG00000118156, ENSG00000115112, ENSG00000261221, ENSG00000146109, ENSG00000135164, ENSG00000136451, ENSG00000188786, ENSG00000186564, ENSG00000146463, ENSG00000145730, ENSG00000167604, ENSG00000123066, ENSG0000…	1866	441	16792	1.28556	1	1	1
GOTERM_BP_DIRECT	GO:0035023	regulation of Rho protein signal transduction	16	0.624025	0.0319038	ENSG00000130762, ENSG00000131037, ENSG00000074964, ENSG00000114209, ENSG00000111348, ENSG00000171680, ENSG00000152767, ENSG00000114346, ENSG00000136002, ENSG00000038382, ENSG00000131089, ENSG00000134215, ENSG00000205726, ENSG00000114790, ENSG00000142632, ENSG00000090924	1866	81	16792	1.77757	1	1	1
GOTERM_BP_DIRECT	GO:0006364	rRNA processing	34	1.32605	0.0321443	ENSG00000111615, ENSG00000109536, ENSG00000162408, ENSG00000136718, ENSG00000134419, ENSG00000112306, ENSG00000119285, ENSG00000241370, ENSG00000171863, ENSG00000142541, ENSG00000053372, ENSG00000174748, ENSG00000170889, ENSG00000088930, ENSG00000105193, ENSG00000063177, ENSG00000105372, ENSG00000172183, ENSG00000104872, ENSG00000105202, ENSG00000077348, ENSG00000115946, ENSG00000197223, ENSG0000…	1866	214	16792	1.42974	1	1	1
GOTERM_BP_DIRECT	GO:0016925	protein sumoylation	21	0.819033	0.0328828	ENSG00000093000, ENSG00000153201, ENSG00000213024, ENSG00000090432, ENSG00000075188, ENSG00000196313, ENSG00000198887, ENSG00000173894, ENSG00000198900, ENSG00000115267, ENSG00000147889, ENSG00000163002, ENSG00000142230, ENSG00000134690, ENSG00000141570, ENSG00000163029, ENSG00000130529, ENSG00000147400, ENSG00000101146, ENSG00000107672, ENSG00000128731	1866	117	16792	1.61519	1	1	1
GOTERM_BP_DIRECT	GO:0006376	mRNA splice site selection	6	0.234009	0.0332185	ENSG00000108848, ENSG00000136450, ENSG00000083896, ENSG00000048740, ENSG00000124193, ENSG00000188529	1866	17	16792	3.17609	1	1	1
GOTERM_BP_DIRECT	GO:0030219	megakaryocyte differentiation	4	0.156006	0.033943	ENSG00000095752, ENSG00000147883, ENSG00000088992, ENSG00000162367	1866	7	16792	5.14224	1	1	1
GOTERM_BP_DIRECT	GO:0035280	miRNA loading onto RISC involved in gene silencing by miRNA	4	0.156006	0.033943	ENSG00000100697, ENSG00000126070, ENSG00000092847, ENSG00000134698	1866	7	16792	5.14224	1	1	1
GOTERM_BP_DIRECT	GO:0045762	positive regulation of adenylate cyclase activity	4	0.156006	0.033943	ENSG00000169676, ENSG00000121905, ENSG00000109501, ENSG00000110680	1866	7	16792	5.14224	1	1	1
GOTERM_BP_DIRECT	GO:0048208	COPII vesicle coating	13	0.50702	0.0341104	ENSG00000101160, ENSG00000105402, ENSG00000148396, ENSG00000074695, ENSG00000198734, ENSG00000138802, ENSG00000105829, ENSG00000167632, ENSG00000007255, ENSG00000105063, ENSG00000054116, ENSG00000107651, ENSG00000109861	1866	61	16792	1.9178	1	1	1
GOTERM_BP_DIRECT	GO:0002576	platelet degranulation	19	0.74103	0.0341551	ENSG00000124491, ENSG00000135218, ENSG00000130402, ENSG00000110799, ENSG00000105329, ENSG00000174175, ENSG00000019991, ENSG00000138722, ENSG00000142192, ENSG00000198734, ENSG00000137801, ENSG00000155657, ENSG00000138798, ENSG00000113140, ENSG00000142168, ENSG00000160014, ENSG00000184500, ENSG00000166479, ENSG00000125257	1866	103	16792	1.66	1	1	1
GOTERM_BP_DIRECT	GO:0071139	resolution of recombination intermediates	3	0.117005	0.0342524	ENSG00000163029, ENSG00000198887, ENSG00000178295	1866	3	16792	8.99893	1	1	1
GOTERM_BP_DIRECT	GO:0002486	antigen processing and presentation of endogenous peptide antigen via MHC class I via ER pathway, TAP-independent	3	0.117005	0.0342524	ENSG00000204525, ENSG00000206503, ENSG00000234745	1866	3	16792	8.99893	1	1	1
GOTERM_BP_DIRECT	GO:0002767	immune response-inhibiting cell surface receptor signaling pathway	3	0.117005	0.0342524	ENSG00000104972, ENSG00000204632, ENSG00000131042	1866	3	16792	8.99893	1	1	1
GOTERM_BP_DIRECT	GO:0050776	regulation of immune response	29	1.13105	0.0365382	ENSG00000134539, ENSG00000240403, ENSG00000243772, ENSG00000131042, ENSG00000174059, ENSG00000189013, ENSG00000189430, ENSG00000168995, ENSG00000234745, ENSG00000204632, ENSG00000188404, ENSG00000170909, ENSG00000130202, ENSG00000104972, ENSG00000126264, ENSG00000104974, ENSG00000129450, ENSG00000134545, ENSG00000204525, ENSG00000011600, ENSG00000167633, ENSG00000213809, ENSG00000204642, ENSG0000…	1866	178	16792	1.46612	1	1	1
GOTERM_BP_DIRECT	GO:0051301	cell division	51	1.98908	0.0372269	ENSG00000108106, ENSG00000198783, ENSG00000197771, ENSG00000133104, ENSG00000117697, ENSG00000086827, ENSG00000007047, ENSG00000159055, ENSG00000108100, ENSG00000186522, ENSG00000070831, ENSG00000152253, ENSG00000196074, ENSG00000175470, ENSG00000156256, ENSG00000154473, ENSG00000113328, ENSG00000153140, ENSG00000075188, ENSG00000074054, ENSG00000116670, ENSG00000116273, ENSG00000138161, ENSG0000…	1866	350	16792	1.31127	1	1	1
GOTERM_BP_DIRECT	GO:0006968	cellular defense response	13	0.50702	0.0381803	ENSG00000240403, ENSG00000131042, ENSG00000255819, ENSG00000197405, ENSG00000189013, ENSG00000011600, ENSG00000113263, ENSG00000189430, ENSG00000136451, ENSG00000120899, ENSG00000204632, ENSG00000205809, ENSG00000258227, ENSG00000183542	1866	62	16792	1.88687	1	1	1
GOTERM_BP_DIRECT	GO:0042147	retrograde transport, endosome to Golgi	14	0.546022	0.0386929	ENSG00000135968, ENSG00000177951, ENSG00000049245, ENSG00000172661, ENSG00000120805, ENSG00000004766, ENSG00000151532, ENSG00000099290, ENSG00000115020, ENSG00000204713, ENSG00000008294, ENSG00000124222, ENSG00000181404, ENSG00000146556	1866	69	16792	1.82587	1	1	1
GOTERM_BP_DIRECT	GO:0042769	DNA damage response, detection of DNA damage	9	0.351014	0.0405812	ENSG00000062822, ENSG00000070950, ENSG00000181991, ENSG00000039650, ENSG00000011590, ENSG00000111445, ENSG00000124766, ENSG00000143476, ENSG00000135972	1866	36	16792	2.24973	1	1	1
GOTERM_BP_DIRECT	GO:1901998	toxin transport	9	0.351014	0.0405812	ENSG00000163297, ENSG00000157869, ENSG00000120438, ENSG00000160179, ENSG00000132141, ENSG00000156261, ENSG00000176171, ENSG00000070018, ENSG00000137752	1866	36	16792	2.24973	1	1	1
GOTERM_BP_DIRECT	GO:0016049	cell growth	12	0.468019	0.0418122	ENSG00000105887, ENSG00000198793, ENSG00000130669, ENSG00000105329, ENSG00000088930, ENSG00000138448, ENSG00000116954, ENSG00000198964, ENSG00000142227, ENSG00000182533, ENSG00000134531, ENSG00000171777	1866	56	16792	1.92834	1	1	1
GOTERM_BP_DIRECT	GO:0046326	positive regulation of glucose import	8	0.312012	0.0424659	ENSG00000116044, ENSG00000184163, ENSG00000169047, ENSG00000128989, ENSG00000095637, ENSG00000105550, ENSG00000105221, ENSG00000067606	1866	30	16792	2.39971	1	1	1
GOTERM_BP_DIRECT	GO:0070301	cellular response to hydrogen peroxide	12	0.468019	0.0468154	ENSG00000213015, ENSG00000107679, ENSG00000196591, ENSG00000116044, ENSG00000141570, ENSG00000132823, ENSG00000185122, ENSG00000135046, ENSG00000114346, ENSG00000011485, ENSG00000176171, ENSG00000167601	1866	57	16792	1.89451	1	1	1
GOTERM_BP_DIRECT	GO:0031054	pre-miRNA processing	5	0.195008	0.0477289	ENSG00000100697, ENSG00000126070, ENSG00000092847, ENSG00000134698, ENSG00000180228	1866	13	16792	3.46113	1	1	1
GOTERM_BP_DIRECT	GO:0043065	positive regulation of apoptotic process	44	1.71607	0.0480555	ENSG00000104228, ENSG00000130758, ENSG00000171680, ENSG00000120949, ENSG00000117318, ENSG00000132792, ENSG00000114346, ENSG00000131089, ENSG00000134215, ENSG00000173545, ENSG00000142168, ENSG00000205726, ENSG00000138376, ENSG00000148400, ENSG00000087088, ENSG00000176171, ENSG00000111707, ENSG00000090924, ENSG00000145335, ENSG00000130762, ENSG00000104972, ENSG00000104312, ENSG00000100292, ENSG0000…	1866	300	16792	1.31984	1	1	1
GOTERM_BP_DIRECT	GO:0034644	cellular response to UV	10	0.390016	0.0497456	ENSG00000062822, ENSG00000183207, ENSG00000144468, ENSG00000048028, ENSG00000102081, ENSG00000004487, ENSG00000087088, ENSG00000188976, ENSG00000078900, ENSG00000132906	1866	44	16792	2.04521	1	1	1
GOTERM_BP_DIRECT	GO:0006879	cellular iron ion homeostasis	10	0.390016	0.0497456	ENSG00000131269, ENSG00000142168, ENSG00000105697, ENSG00000100292, ENSG00000162769, ENSG00000100644, ENSG00000153162, ENSG00000136003, ENSG00000122729, ENSG00000087086	1866	44	16792	2.04521	1	1	1
GOTERM_BP_DIRECT	GO:0000288	nuclear-transcribed mRNA catabolic process, deadenylation-dependent decay	4	0.156006	0.049903	ENSG00000088038, ENSG00000111596, ENSG00000110063, ENSG00000128016	1866	8	16792	4.49946	1	1	1
GOTERM_BP_DIRECT	GO:0015939	pantothenate metabolic process	4	0.156006	0.049903	ENSG00000093134, ENSG00000149313, ENSG00000112303, ENSG00000112299	1866	8	16792	4.49946	1	1	1
GOTERM_BP_DIRECT	GO:0021952	central nervous system projection neuron axonogenesis	4	0.156006	0.049903	ENSG00000153234, ENSG00000133216, ENSG00000154928, ENSG00000160460	1866	8	16792	4.49946	1	1	1
GOTERM_BP_DIRECT	GO:0006623	protein targeting to vacuole	4	0.156006	0.049903	ENSG00000129003, ENSG00000006715, ENSG00000048707, ENSG00000151532	1866	8	16792	4.49946	1	1	1
GOTERM_CC_DIRECT	GO:0005654	nucleoplasm	391	15.2496	1.13173e-07	ENSG00000183527, ENSG00000116809, ENSG00000092871, ENSG00000113658, ENSG00000104824, ENSG00000204673, ENSG00000114861, ENSG00000198900, ENSG00000075292, ENSG00000079785, ENSG00000023608, ENSG00000128915, ENSG00000108061, ENSG00000148400, ENSG00000146463, ENSG00000156261, ENSG00000178295, ENSG00000124795, ENSG00000259494, ENSG00000115946, ENSG00000075188, ENSG00000113643, ENSG00000133398, ENSG0000…	2019	2784	18224	1.2677	9.55131e-05	9.55176e-05	9.51781e-05
GOTERM_CC_DIRECT	GO:0016020	membrane	310	12.0905	2.3077e-06	ENSG00000149294, ENSG00000105357, ENSG00000006715, ENSG00000092871, ENSG00000102081, ENSG00000144040, ENSG00000161618, ENSG00000104823, ENSG00000104824, ENSG00000198589, ENSG00000196961, ENSG00000111596, ENSG00000006712, ENSG00000112685, ENSG00000077232, ENSG00000171302, ENSG00000213949, ENSG00000142541, ENSG00000079785, ENSG00000162391, ENSG00000088930, ENSG00000102524, ENSG00000023171, ENSG0000…	2019	2200	18224	1.27188	0.00194581	0.00097385	0.000970388
GOTERM_CC_DIRECT	GO:0005829	cytosol	440	17.1607	9.33676e-06	ENSG00000156265, ENSG00000092871, ENSG00000113658, ENSG00000196961, ENSG00000112685, ENSG00000104825, ENSG00000111596, ENSG00000204673, ENSG00000133026, ENSG00000131089, ENSG00000167280, ENSG00000023734, ENSG00000148400, ENSG00000156261, ENSG00000089220, ENSG00000070831, ENSG00000111348, ENSG00000115946, ENSG00000104812, ENSG00000075188, ENSG00000136783, ENSG00000104936, ENSG00000224051, ENSG0000…	2019	3315	18224	1.19805	0.0078493	0.00262674	0.00261741
GOTERM_CC_DIRECT	GO:0000139	Golgi membrane	97	3.78315	7.13984e-05	ENSG00000149294, ENSG00000109956, ENSG00000092871, ENSG00000113532, ENSG00000151532, ENSG00000130035, ENSG00000011478, ENSG00000164574, ENSG00000123989, ENSG00000148400, ENSG00000184500, ENSG00000142546, ENSG00000107651, ENSG00000070831, ENSG00000103043, ENSG00000124164, ENSG00000198734, ENSG00000171310, ENSG00000159128, ENSG00000164342, ENSG00000169359, ENSG00000115020, ENSG00000121578, ENSG0000…	2019	591	18224	1.48147	0.0584826	0.0150651	0.0150115
GOTERM_CC_DIRECT	GO:0005737	cytoplasm	644	25.117	0.00043434	ENSG00000183527, ENSG00000214114, ENSG00000213024, ENSG00000139926, ENSG00000092871, ENSG00000137628, ENSG00000113658, ENSG00000104824, ENSG00000111596, ENSG00000167281, ENSG00000204673, ENSG00000104826, ENSG00000133026, ENSG00000131089, ENSG00000167280, ENSG00000023734, ENSG00000075292, ENSG00000111110, ENSG00000079785, ENSG00000108061, ENSG00000102524, ENSG00000146463, ENSG00000156261, ENSG0000…	2019	5222	18224	1.11316	0.306956	0.0733165	0.0730559
GOTERM_CC_DIRECT	GO:0005730	nucleolus	123	4.79719	0.00208704	ENSG00000130038, ENSG00000180530, ENSG00000102081, ENSG00000198900, ENSG00000142541, ENSG00000146109, ENSG00000167565, ENSG00000088930, ENSG00000023608, ENSG00000139083, ENSG00000164576, ENSG00000143476, ENSG00000100292, ENSG00000173451, ENSG00000113649, ENSG00000115946, ENSG00000153140, ENSG00000137876, ENSG00000224051, ENSG00000065548, ENSG00000001497, ENSG00000135972, ENSG00000170854, ENSG0000…	2019	857	18224	1.29548	0.828522	0.293576	0.292533
GOTERM_CC_DIRECT	GO:0005634	nucleus	656	25.585	0.00253152	ENSG00000185947, ENSG00000183527, ENSG00000214114, ENSG00000156265, ENSG00000178177, ENSG00000156384, ENSG00000113658, ENSG00000104824, ENSG00000104825, ENSG00000111596, ENSG00000167281, ENSG00000114861, ENSG00000133026, ENSG00000023734, ENSG00000198900, ENSG00000171425, ENSG00000075292, ENSG00000111110, ENSG00000261221, ENSG00000248483, ENSG00000146109, ENSG00000270181, ENSG00000079785, ENSG0000…	2019	5415	18224	1.09348	0.882264	0.305229	0.304144
GOTERM_CC_DIRECT	GO:0015030	Cajal body	14	0.546022	0.00302672	ENSG00000075856, ENSG00000105202, ENSG00000172183, ENSG00000109536, ENSG00000102081, ENSG00000105618, ENSG00000132274, ENSG00000173641, ENSG00000174606, ENSG00000164151, ENSG00000185046, ENSG00000128915, ENSG00000142528, ENSG00000181817	2019	51	18224	2.47779	0.922573	0.319319	0.318184
GOTERM_CC_DIRECT	GO:0070578	RISC-loading complex	5	0.195008	0.00398022	ENSG00000100697, ENSG00000126070, ENSG00000092847, ENSG00000134698, ENSG00000128016	2019	7	18224	6.44732	0.965473	0.343079	0.34186
GOTERM_CC_DIRECT	GO:0005763	mitochondrial small ribosomal subunit	9	0.351014	0.00426544	ENSG00000144029, ENSG00000090263, ENSG00000122140, ENSG00000181991, ENSG00000128626, ENSG00000147586, ENSG00000116898, ENSG00000243927, ENSG00000135972	2019	25	18224	3.24945	0.972887	0.343079	0.34186
GOTERM_CC_DIRECT	GO:0016607	nuclear speck	36	1.40406	0.00447141	ENSG00000075856, ENSG00000180530, ENSG00000198783, ENSG00000108848, ENSG00000174891, ENSG00000124193, ENSG00000105618, ENSG00000120948, ENSG00000132274, ENSG00000171566, ENSG00000075292, ENSG00000185272, ENSG00000136450, ENSG00000100644, ENSG00000081189, ENSG00000163029, ENSG00000183431, ENSG00000051596, ENSG00000161265, ENSG00000105197, ENSG00000221978, ENSG00000188529, ENSG00000132424, ENSG0000…	2019	201	18224	1.61664	0.977231	0.343079	0.34186
GOTERM_CC_DIRECT	GO:0032433	filopodium tip	6	0.234009	0.00671855	ENSG00000154928, ENSG00000102081, ENSG00000196961, ENSG00000197535, ENSG00000167614, ENSG00000145555	2019	12	18224	4.51313	0.996619	0.471673	0.469997
GOTERM_CC_DIRECT	GO:0072669	tRNA-splicing ligase complex	5	0.195008	0.00726511	ENSG00000176261, ENSG00000087302, ENSG00000079785, ENSG00000135974, ENSG00000130244	2019	8	18224	5.64141	0.997875	0.471673	0.469997
GOTERM_CC_DIRECT	GO:0005739	mitochondrion	176	6.86427	0.00787891	ENSG00000214114, ENSG00000105755, ENSG00000151093, ENSG00000104823, ENSG00000005469, ENSG00000038274, ENSG00000007923, ENSG00000186081, ENSG00000133026, ENSG00000196449, ENSG00000135049, ENSG00000083123, ENSG00000151806, ENSG00000168653, ENSG00000124279, ENSG00000140009, ENSG00000111906, ENSG00000162398, ENSG00000105197, ENSG00000142544, ENSG00000259494, ENSG00000070214, ENSG00000130204, ENSG0000…	2019	1331	18224	1.19355	0.998739	0.474986	0.473297
GOTERM_CC_DIRECT	GO:0001726	ruffle	19	0.74103	0.00908349	ENSG00000088280, ENSG00000105810, ENSG00000243678, ENSG00000182718, ENSG00000124181, ENSG00000148384, ENSG00000067900, ENSG00000197535, ENSG00000155307, ENSG00000114790, ENSG00000121621, ENSG00000158195, ENSG00000145715, ENSG00000187994, ENSG00000124209, ENSG00000011052, ENSG00000088992, ENSG00000145555, ENSG00000087460	2019	90	18224	1.90554	0.999548	0.511098	0.509281
GOTERM_CC_DIRECT	GO:0043231	intracellular membrane-bounded organelle	80	3.12012	0.0131347	ENSG00000213024, ENSG00000049245, ENSG00000005469, ENSG00000112685, ENSG00000151657, ENSG00000075292, ENSG00000112167, ENSG00000130035, ENSG00000121766, ENSG00000163002, ENSG00000136451, ENSG00000081189, ENSG00000023608, ENSG00000160179, ENSG00000221978, ENSG00000143476, ENSG00000140443, ENSG00000127870, ENSG00000112118, ENSG00000196550, ENSG00000177054, ENSG00000067365, ENSG00000132825, ENSG0000…	2019	558	18224	1.29409	0.999986	0.689932	0.68748
GOTERM_CC_DIRECT	GO:0031258	lamellipodium membrane	7	0.273011	0.0138967	ENSG00000061676, ENSG00000142627, ENSG00000125753, ENSG00000138448, ENSG00000054654, ENSG00000197635, ENSG00000078098	2019	19	18224	3.32546	0.999993	0.689932	0.68748
GOTERM_CC_DIRECT	GO:0032580	Golgi cisterna membrane	16	0.624025	0.0183242	ENSG00000176022, ENSG00000148384, ENSG00000205155, ENSG00000174951, ENSG00000115339, ENSG00000104805, ENSG00000171302, ENSG00000176920, ENSG00000115652, ENSG00000080371, ENSG00000121578, ENSG00000173905, ENSG00000145817, ENSG00000123989, ENSG00000110080, ENSG00000184389	2019	76	18224	1.90026	1	0.842732	0.839737
GOTERM_CC_DIRECT	GO:0071203	WASH complex	6	0.234009	0.0192083	ENSG00000099290, ENSG00000077549, ENSG00000172661, ENSG00000120860, ENSG00000181404, ENSG00000146556	2019	15	18224	3.6105	1	0.842732	0.839737
GOTERM_CC_DIRECT	GO:0030134	ER to Golgi transport vesicle	8	0.312012	0.01997	ENSG00000101160, ENSG00000145817, ENSG00000074695, ENSG00000142192, ENSG00000198734, ENSG00000107651, ENSG00000109861, ENSG00000167645	2019	26	18224	2.77731	1	0.842732	0.839737
GOTERM_CC_DIRECT	GO:0000932	cytoplasmic mRNA processing body	16	0.624025	0.0228668	ENSG00000198492, ENSG00000132109, ENSG00000179134, ENSG00000111596, ENSG00000126070, ENSG00000110063, ENSG00000134698, ENSG00000134644, ENSG00000198900, ENSG00000132256, ENSG00000189266, ENSG00000064726, ENSG00000088038, ENSG00000161057, ENSG00000092847, ENSG00000128016	2019	78	18224	1.85154	1	0.919027	0.91576
GOTERM_CC_DIRECT	GO:0030686	90S preribosome	5	0.195008	0.0261011	ENSG00000168028, ENSG00000184220, ENSG00000119285, ENSG00000171863, ENSG00000165733	2019	11	18224	4.10284	1	0.957798	0.954393
GOTERM_CC_DIRECT	GO:0042612	MHC class I protein complex	5	0.195008	0.0261011	ENSG00000204525, ENSG00000204642, ENSG00000206503, ENSG00000234745, ENSG00000204632	2019	11	18224	4.10284	1	0.957798	0.954393
GOTERM_CC_DIRECT	GO:0032002	interleukin-28 receptor complex	3	0.117005	0.0340573	ENSG00000182393, ENSG00000243646, ENSG00000185436	2019	3	18224	9.02625	1	1	0.997628
GOTERM_CC_DIRECT	GO:0016592	mediator complex	9	0.351014	0.0343089	ENSG00000132964, ENSG00000063322, ENSG00000164758, ENSG00000112237, ENSG00000155868, ENSG00000123066, ENSG00000054118, ENSG00000133398, ENSG00000130772	2019	35	18224	2.32104	1	1	0.997628
GOTERM_CC_DIRECT	GO:0031093	platelet alpha granule lumen	12	0.468019	0.0365154	ENSG00000124491, ENSG00000113140, ENSG00000130402, ENSG00000110799, ENSG00000105329, ENSG00000019991, ENSG00000138722, ENSG00000142192, ENSG00000198734, ENSG00000184500, ENSG00000137801, ENSG00000138798	2019	55	18224	1.96936	1	1	0.997628
GOTERM_CC_DIRECT	GO:0005783	endoplasmic reticulum	109	4.25117	0.0388345	ENSG00000183527, ENSG00000130558, ENSG00000198589, ENSG00000157870, ENSG00000151779, ENSG00000197535, ENSG00000163082, ENSG00000077232, ENSG00000167600, ENSG00000145934, ENSG00000160097, ENSG00000107651, ENSG00000103043, ENSG00000175471, ENSG00000130203, ENSG00000124164, ENSG00000100292, ENSG00000130208, ENSG00000147383, ENSG00000076554, ENSG00000136026, ENSG00000159128, ENSG00000116237, ENSG0000…	2019	828	18224	1.18824	1	1	0.997628
GOTERM_CC_DIRECT	GO:0031092	platelet alpha granule membrane	5	0.195008	0.0472852	ENSG00000113140, ENSG00000135218, ENSG00000174175, ENSG00000166479, ENSG00000145335	2019	13	18224	3.47163	1	1	0.997628
GOTERM_CC_DIRECT	GO:0032797	SMN complex	5	0.195008	0.0472852	ENSG00000142252, ENSG00000102081, ENSG00000082516, ENSG00000023734, ENSG00000046647	2019	13	18224	3.47163	1	1	0.997628
GOTERM_CC_DIRECT	GO:0030027	lamellipodium	26	1.01404	0.0480031	ENSG00000243678, ENSG00000099204, ENSG00000171680, ENSG00000197635, ENSG00000133026, ENSG00000205726, ENSG00000120899, ENSG00000204138, ENSG00000011052, ENSG00000115091, ENSG00000142627, ENSG00000088992, ENSG00000127328, ENSG00000145555, ENSG00000077549, ENSG00000135636, ENSG00000065243, ENSG00000124181, ENSG00000067900, ENSG00000078098, ENSG00000187164, ENSG00000158195, ENSG00000121879, ENSG0000…	2019	160	18224	1.46677	1	1	0.997628
GOTERM_CC_DIRECT	GO:0035861	site of double-strand break	8	0.312012	0.0491254	ENSG00000070950, ENSG00000115966, ENSG00000163029, ENSG00000188996, ENSG00000198887, ENSG00000170364, ENSG00000163104, ENSG00000104320	2019	31	18224	2.32935	1	1	0.997628
GOTERM_CC_DIRECT	GO:0072559	NLRP3 inflammasome complex	4	0.156006	0.0495256	ENSG00000137757, ENSG00000105483, ENSG00000196954, ENSG00000137752	2019	8	18224	4.51313	1	1	0.997628
GOTERM_MF_DIRECT	GO:0005515	protein binding	1068	41.6537	2.00513e-05	ENSG00000183527, ENSG00000214114, ENSG00000213024, ENSG00000110148, ENSG00000092871, ENSG00000178177, ENSG00000137628, ENSG00000156384, ENSG00000113658, ENSG00000133265, ENSG00000116922, ENSG00000077232, ENSG00000133026, ENSG00000174804, ENSG00000146109, ENSG00000128915, ENSG00000108061, ENSG00000102524, ENSG00000160410, ENSG00000089220, ENSG00000070831, ENSG00000213015, ENSG00000135218, ENSG0000…	1889	8785	16881	1.08641	0.0311653	0.031661	0.031661
GOTERM_MF_DIRECT	GO:0030246	carbohydrate binding	38	1.48206	0.00097031	ENSG00000174473, ENSG00000134539, ENSG00000174175, ENSG00000158089, ENSG00000115339, ENSG00000134153, ENSG00000174059, ENSG00000006659, ENSG00000116663, ENSG00000130035, ENSG00000116661, ENSG00000164574, ENSG00000168995, ENSG00000114480, ENSG00000188404, ENSG00000166979, ENSG00000142748, ENSG00000205809, ENSG00000161640, ENSG00000103512, ENSG00000085265, ENSG00000105472, ENSG00000105198, ENSG0000…	1889	196	16881	1.73258	0.784084	0.583377	0.583377
GOTERM_MF_DIRECT	GO:0044822	poly(A) RNA binding	160	6.24025	0.00110838	ENSG00000075856, ENSG00000102081, ENSG00000182718, ENSG00000180098, ENSG00000104824, ENSG00000197535, ENSG00000111196, ENSG00000023734, ENSG00000198900, ENSG00000075292, ENSG00000156304, ENSG00000142541, ENSG00000146109, ENSG00000079785, ENSG00000088930, ENSG00000184220, ENSG00000105193, ENSG00000124279, ENSG00000126457, ENSG00000162437, ENSG00000142546, ENSG00000089220, ENSG00000107651, ENSG0000…	1889	1129	16881	1.26646	0.826417	0.583377	0.583377
GOTERM_MF_DIRECT	GO:0097153	cysteine-type endopeptidase activity involved in apoptotic process	7	0.273011	0.00165867	ENSG00000138794, ENSG00000165806, ENSG00000105205, ENSG00000137757, ENSG00000132906, ENSG00000196954, ENSG00000137752	1889	13	16881	4.81195	0.927285	0.65476	0.65476
GOTERM_MF_DIRECT	GO:0019901	protein kinase binding	61	2.3791	0.00287662	ENSG00000092871, ENSG00000005700, ENSG00000196961, ENSG00000112685, ENSG00000155657, ENSG00000132256, ENSG00000160014, ENSG00000108100, ENSG00000088970, ENSG00000221978, ENSG00000089220, ENSG00000145730, ENSG00000070831, ENSG00000064651, ENSG00000104812, ENSG00000136861, ENSG00000008405, ENSG00000171552, ENSG00000067606, ENSG00000169756, ENSG00000101868, ENSG00000088325, ENSG00000185104, ENSG0000…	1889	376	16881	1.4498	0.989419	0.908435	0.908435
GOTERM_MF_DIRECT	GO:0003909	DNA ligase activity	4	0.156006	0.00511995	ENSG00000005156, ENSG00000174405, ENSG00000105486, ENSG00000073050	1889	4	16881	8.93647	0.999698	1	1
GOTERM_MF_DIRECT	GO:0033691	sialic acid binding	5	0.195008	0.0075305	ENSG00000007908, ENSG00000174175, ENSG00000188157, ENSG00000113532, ENSG00000085265	1889	8	16881	5.5853	0.999993	1	1
GOTERM_MF_DIRECT	GO:0000981	RNA polymerase II transcription factor activity, sequence-specific DNA binding	31	1.20905	0.00827263	ENSG00000130751, ENSG00000197056, ENSG00000198146, ENSG00000177606, ENSG00000114861, ENSG00000157554, ENSG00000137203, ENSG00000165684, ENSG00000166211, ENSG00000135164, ENSG00000186564, ENSG00000170608, ENSG00000081189, ENSG00000146463, ENSG00000163867, ENSG00000139083, ENSG00000105672, ENSG00000116819, ENSG00000105722, ENSG00000105866, ENSG00000104856, ENSG00000151702, ENSG00000166261, ENSG0000…	1889	171	16881	1.62006	0.999998	1	1
GOTERM_MF_DIRECT	GO:0001046	core promoter sequence-specific DNA binding	11	0.429017	0.0181047	ENSG00000174738, ENSG00000180530, ENSG00000095794, ENSG00000069667, ENSG00000081189, ENSG00000140009, ENSG00000008405, ENSG00000124766, ENSG00000107485, ENSG00000198900, ENSG00000054118	1889	43	16881	2.28607	1	1	1
GOTERM_MF_DIRECT	GO:0008599	protein phosphatase type 1 regulator activity	5	0.195008	0.0188059	ENSG00000084463, ENSG00000204138, ENSG00000101445, ENSG00000112137, ENSG00000087074	1889	10	16881	4.46824	1	1	1
GOTERM_MF_DIRECT	GO:0043130	ubiquitin binding	16	0.624025	0.0247545	ENSG00000155313, ENSG00000198690, ENSG00000156256, ENSG00000213024, ENSG00000243667, ENSG00000154473, ENSG00000008405, ENSG00000077254, ENSG00000068903, ENSG00000058056, ENSG00000121621, ENSG00000007047, ENSG00000101146, ENSG00000185104, ENSG00000147601, ENSG00000162585	1889	78	16881	1.83312	1	1	1
GOTERM_MF_DIRECT	GO:0003779	actin binding	43	1.67707	0.0264502	ENSG00000064042, ENSG00000130755, ENSG00000099204, ENSG00000151491, ENSG00000133627, ENSG00000197535, ENSG00000133026, ENSG00000144821, ENSG00000082397, ENSG00000121621, ENSG00000089327, ENSG00000204138, ENSG00000127603, ENSG00000095637, ENSG00000148700, ENSG00000175130, ENSG00000131037, ENSG00000077549, ENSG00000129991, ENSG00000131018, ENSG00000188906, ENSG00000130402, ENSG00000156232, ENSG0000…	1889	278	16881	1.38226	1	1	1
GOTERM_MF_DIRECT	GO:0004872	receptor activity	35	1.36505	0.0266726	ENSG00000186818, ENSG00000239998, ENSG00000049249, ENSG00000215788, ENSG00000135960, ENSG00000243772, ENSG00000131042, ENSG00000118257, ENSG00000119900, ENSG00000168995, ENSG00000204577, ENSG00000148400, ENSG00000164758, ENSG00000164116, ENSG00000106123, ENSG00000088053, ENSG00000103043, ENSG00000136869, ENSG00000105767, ENSG00000061918, ENSG00000243646, ENSG00000178726, ENSG00000174600, ENSG0000…	1889	217	16881	1.44137	1	1	1
GOTERM_MF_DIRECT	GO:0005003	ephrin receptor activity	5	0.195008	0.0269803	ENSG00000183317, ENSG00000133216, ENSG00000154928, ENSG00000142627, ENSG00000106123	1889	11	16881	4.06203	1	1	1
GOTERM_MF_DIRECT	GO:0046977	TAP binding	3	0.117005	0.034714	ENSG00000204525, ENSG00000206503, ENSG00000234745	1889	3	16881	8.93647	1	1	1
GOTERM_MF_DIRECT	GO:0017159	pantetheine hydrolase activity	3	0.117005	0.034714	ENSG00000093134, ENSG00000112303, ENSG00000112299	1889	3	16881	8.93647	1	1	1
GOTERM_MF_DIRECT	GO:0023024	MHC class I protein complex binding	3	0.117005	0.034714	ENSG00000134539, ENSG00000205809, ENSG00000134545	1889	3	16881	8.93647	1	1	1
GOTERM_MF_DIRECT	GO:0005010	insulin-like growth factor-activated receptor activity	3	0.117005	0.034714	ENSG00000150938, ENSG00000197081, ENSG00000140443	1889	3	16881	8.93647	1	1	1
GOTERM_MF_DIRECT	GO:0003735	structural constituent of ribosome	35	1.36505	0.035716	ENSG00000075415, ENSG00000134419, ENSG00000112306, ENSG00000242485, ENSG00000171421, ENSG00000171863, ENSG00000144029, ENSG00000142541, ENSG00000053372, ENSG00000163584, ENSG00000174748, ENSG00000170889, ENSG00000105193, ENSG00000063177, ENSG00000105372, ENSG00000243927, ENSG00000144741, ENSG00000259494, ENSG00000090263, ENSG00000155287, ENSG00000122140, ENSG00000181991, ENSG00000075303, ENSG0000…	1889	222	16881	1.4089	1	1	1
GOTERM_MF_DIRECT	GO:0004197	cysteine-type endopeptidase activity	13	0.50702	0.0357424	ENSG00000101160, ENSG00000156256, ENSG00000165806, ENSG00000137757, ENSG00000077254, ENSG00000196954, ENSG00000137752, ENSG00000058056, ENSG00000138794, ENSG00000101844, ENSG00000142910, ENSG00000132906, ENSG00000109861	1889	61	16881	1.90449	1	1	1
GOTERM_MF_DIRECT	GO:0004518	nuclease activity	7	0.273011	0.0367835	ENSG00000198690, ENSG00000134899, ENSG00000169598, ENSG00000079785, ENSG00000088930, ENSG00000178295, ENSG00000203705	1889	23	16881	2.7198	1	1	1
GOTERM_MF_DIRECT	GO:0019888	protein phosphatase regulator activity	8	0.312012	0.0370853	ENSG00000175470, ENSG00000154001, ENSG00000156475, ENSG00000108061, ENSG00000066027, ENSG00000128989, ENSG00000101445, ENSG00000087074	1889	29	16881	2.46523	1	1	1
GOTERM_MF_DIRECT	GO:0008157	protein phosphatase 1 binding	6	0.234009	0.0430154	ENSG00000104972, ENSG00000204138, ENSG00000108061, ENSG00000131042, ENSG00000112137, ENSG00000087074	1889	18	16881	2.97882	1	1	1
GOTERM_MF_DIRECT	GO:0016301	kinase activity	37	1.44306	0.0433538	ENSG00000261740, ENSG00000198001, ENSG00000123080, ENSG00000151491, ENSG00000141506, ENSG00000198964, ENSG00000179988, ENSG00000198648, ENSG00000023734, ENSG00000004799, ENSG00000078142, ENSG00000172456, ENSG00000160014, ENSG00000142627, ENSG00000063176, ENSG00000180228, ENSG00000168734, ENSG00000131037, ENSG00000188906, ENSG00000104312, ENSG00000065243, ENSG00000198793, ENSG00000104879, ENSG0000…	1889	241	16881	1.37199	1	1	1
GOTERM_MF_DIRECT	GO:0001618	virus receptor activity	14	0.546022	0.0449594	ENSG00000149294, ENSG00000130202, ENSG00000185803, ENSG00000186827, ENSG00000138448, ENSG00000113249, ENSG00000197635, ENSG00000157873, ENSG00000203710, ENSG00000117322, ENSG00000168028, ENSG00000105281, ENSG00000258227, ENSG00000167601	1889	70	16881	1.78729	1	1	1
GOTERM_MF_DIRECT	GO:0001047	core promoter binding	13	0.50702	0.0494802	ENSG00000196591, ENSG00000137947, ENSG00000129173, ENSG00000104856, ENSG00000008405, ENSG00000007968, ENSG00000112242, ENSG00000174953, ENSG00000116560, ENSG00000188786, ENSG00000148400, ENSG00000092847, ENSG00000144445	1889	64	16881	1.81522	1	1	1

## Sheet: mono_THP-1_b2a
Category	Term		Count	%	PValue	Genes	List Total	Pop Hits	Pop Total	Fold Enrichment	Bonferroni	Benjamini	FDR
GOTERM_BP_DIRECT	GO:0006355	regulation of transcription, DNA-templated	83	12.26	9.9807e-09	ENSG00000234284, ENSG00000197054, ENSG00000112249, ENSG00000198342, ENSG00000140836, ENSG00000152382, ENSG00000020426, ENSG00000132010, ENSG00000174652, ENSG00000197933, ENSG00000171466, ENSG00000171469, ENSG00000198947, ENSG00000197857, ENSG00000198429, ENSG00000187098, ENSG00000125846, ENSG00000125845, ENSG00000100625, ENSG00000257446, ENSG00000101115, ENSG00000127989, ENSG00000143157, ENSG0000…	484	1504	16792	1.91464	2.22268e-05	2.2227e-05	2.2227e-05
GOTERM_BP_DIRECT	GO:0021846	cell proliferation in forebrain	5	0.738552	0.000278466	ENSG00000149948, ENSG00000154342, ENSG00000162946, ENSG00000118193, ENSG00000154764	484	12	16792	14.4559	0.462179	0.310072	0.310072
GOTERM_BP_DIRECT	GO:0006351	transcription, DNA-templated	82	12.1123	0.00043131	ENSG00000234284, ENSG00000143190, ENSG00000197054, ENSG00000112249, ENSG00000198342, ENSG00000152382, ENSG00000132010, ENSG00000174652, ENSG00000197933, ENSG00000171466, ENSG00000171469, ENSG00000197857, ENSG00000198429, ENSG00000141376, ENSG00000125846, ENSG00000257446, ENSG00000162711, ENSG00000121481, ENSG00000182568, ENSG00000162676, ENSG00000188868, ENSG00000257591, ENSG00000214189, ENSG0000…	484	1955	16792	1.4552	0.617388	0.320176	0.320176
GOTERM_BP_DIRECT	GO:0007584	response to nutrient	9	1.32939	0.00126267	ENSG00000108602, ENSG00000162692, ENSG00000023909, ENSG00000116906, ENSG00000083720, ENSG00000183023, ENSG00000123983, ENSG00000196139, ENSG00000118432	484	74	16792	4.21957	0.94002	0.70299	0.70299
GOTERM_BP_DIRECT	GO:0045446	endothelial cell differentiation	4	0.590842	0.00328446	ENSG00000159307, ENSG00000170989, ENSG00000230667, ENSG00000101384	484	11	16792	12.6161	0.999342	1	1
GOTERM_BP_DIRECT	GO:0007155	cell adhesion	25	3.69276	0.00368523	ENSG00000183628, ENSG00000181143, ENSG00000130396, ENSG00000133401, ENSG00000058085, ENSG00000183090, ENSG00000153774, ENSG00000135862, ENSG00000162692, ENSG00000170989, ENSG00000165124, ENSG00000150637, ENSG00000143196, ENSG00000143153, ENSG00000050820, ENSG00000105426, ENSG00000138964, ENSG00000115963, ENSG00000151422, ENSG00000079112, ENSG00000151914, ENSG00000091128, ENSG00000188677, ENSG0000…	484	459	16792	1.88966	0.999731	1	1
GOTERM_BP_DIRECT	GO:0045893	positive regulation of transcription, DNA-templated	27	3.98818	0.00410374	ENSG00000101096, ENSG00000154342, ENSG00000140836, ENSG00000138379, ENSG00000154764, ENSG00000187098, ENSG00000140285, ENSG00000125845, ENSG00000100625, ENSG00000115170, ENSG00000141293, ENSG00000089123, ENSG00000182621, ENSG00000162851, ENSG00000152495, ENSG00000162714, ENSG00000116833, ENSG00000171634, ENSG00000073282, ENSG00000149948, ENSG00000122728, ENSG00000205213, ENSG00000135272, ENSG0000…	484	515	16792	1.81892	0.999895	1	1
GOTERM_BP_DIRECT	GO:0007368	determination of left/right symmetry	7	1.03397	0.00482967	ENSG00000103494, ENSG00000099139, ENSG00000115170, ENSG00000256061, ENSG00000184058, ENSG00000125863, ENSG00000140479	484	55	16792	4.41563	0.999979	1	1
GOTERM_BP_DIRECT	GO:0051056	regulation of small GTPase mediated signal transduction	11	1.62482	0.00537963	ENSG00000196935, ENSG00000116991, ENSG00000072422, ENSG00000186716, ENSG00000137727, ENSG00000241484, ENSG00000188559, ENSG00000248405, ENSG00000160145, ENSG00000066933, ENSG00000137962, ENSG00000047648	484	134	16792	2.84803	0.999994	1	1
GOTERM_BP_DIRECT	GO:0014904	myotube cell development	3	0.443131	0.00779385	ENSG00000101096, ENSG00000185420, ENSG00000198947	484	5	16792	20.8165	1	1	1
GOTERM_BP_DIRECT	GO:0007416	synapse assembly	7	1.03397	0.00801143	ENSG00000197959, ENSG00000154342, ENSG00000116906, ENSG00000141837, ENSG00000125848, ENSG00000163785, ENSG00000154764	484	61	16792	3.9813	1	1	1
GOTERM_BP_DIRECT	GO:0070848	response to growth factor	4	0.590842	0.0100182	ENSG00000117560, ENSG00000169860, ENSG00000141448, ENSG00000139329	484	16	16792	8.67355	1	1	1
GOTERM_BP_DIRECT	GO:0031532	actin cytoskeleton reorganization	6	0.886263	0.0109528	ENSG00000170989, ENSG00000140285, ENSG00000138964, ENSG00000116218, ENSG00000188677, ENSG00000151422	484	47	16792	4.42905	1	1	1
GOTERM_BP_DIRECT	GO:0030091	protein repair	3	0.443131	0.0114691	ENSG00000175806, ENSG00000174099, ENSG00000148450	484	6	16792	17.3471	1	1	1
GOTERM_BP_DIRECT	GO:0022038	corpus callosum development	3	0.443131	0.0114691	ENSG00000103494, ENSG00000198121, ENSG00000163785	484	6	16792	17.3471	1	1	1
GOTERM_BP_DIRECT	GO:0060037	pharyngeal system development	4	0.590842	0.0139907	ENSG00000100625, ENSG00000115170, ENSG00000184058, ENSG00000185920	484	18	16792	7.70983	1	1	1
GOTERM_BP_DIRECT	GO:0010882	regulation of cardiac muscle contraction by calcium ion signaling	3	0.443131	0.015753	ENSG00000183023, ENSG00000145362, ENSG00000143153	484	7	16792	14.8689	1	1	1
GOTERM_BP_DIRECT	GO:0010881	regulation of cardiac muscle contraction by regulation of the release of sequestered calcium ion	4	0.590842	0.0162655	ENSG00000145349, ENSG00000183023, ENSG00000145362, ENSG00000198947	484	19	16792	7.30405	1	1	1
GOTERM_BP_DIRECT	GO:0032880	regulation of protein localization	6	0.886263	0.0165216	ENSG00000143951, ENSG00000135823, ENSG00000152061, ENSG00000100625, ENSG00000130396, ENSG00000185920	484	52	16792	4.00318	1	1	1
GOTERM_BP_DIRECT	GO:0042594	response to starvation	5	0.738552	0.0174925	ENSG00000141376, ENSG00000116906, ENSG00000083720, ENSG00000083290, ENSG00000131374	484	35	16792	4.95632	1	1	1
GOTERM_BP_DIRECT	GO:0006468	protein phosphorylation	22	3.24963	0.023758	ENSG00000152495, ENSG00000186716, ENSG00000135828, ENSG00000020426, ENSG00000196455, ENSG00000028116, ENSG00000151422, ENSG00000145349, ENSG00000145348, ENSG00000168038, ENSG00000122728, ENSG00000116141, ENSG00000125845, ENSG00000163491, ENSG00000115170, ENSG00000071909, ENSG00000160145, ENSG00000146872, ENSG00000127334, ENSG00000183049, ENSG00000163785, ENSG00000104375	484	456	16792	1.67384	1	1	1
GOTERM_BP_DIRECT	GO:0035556	intracellular signal transduction	20	2.95421	0.0248525	ENSG00000152495, ENSG00000186716, ENSG00000185838, ENSG00000214944, ENSG00000069702, ENSG00000263155, ENSG00000066933, ENSG00000151422, ENSG00000137962, ENSG00000255529, ENSG00000166510, ENSG00000081026, ENSG00000116141, ENSG00000118507, ENSG00000160145, ENSG00000144681, ENSG00000146872, ENSG00000069020, ENSG00000182621, ENSG00000104375	484	403	16792	1.7218	1	1	1
GOTERM_BP_DIRECT	GO:0016477	cell migration	11	1.62482	0.0272373	ENSG00000101096, ENSG00000170989, ENSG00000150093, ENSG00000162704, ENSG00000033170, ENSG00000069702, ENSG00000120332, ENSG00000143322, ENSG00000050820, ENSG00000170577, ENSG00000135862	484	172	16792	2.21882	1	1	1
GOTERM_BP_DIRECT	GO:0042102	positive regulation of T cell proliferation	6	0.886263	0.0288584	ENSG00000117586, ENSG00000162692, ENSG00000095059, ENSG00000111537, ENSG00000164136, ENSG00000134258	484	60	16792	3.46942	1	1	1
GOTERM_BP_DIRECT	GO:0060976	coronary vasculature development	4	0.590842	0.0340213	ENSG00000049323, ENSG00000099139, ENSG00000139174, ENSG00000006125	484	25	16792	5.55107	1	1	1
GOTERM_BP_DIRECT	GO:0030488	tRNA methylation	4	0.590842	0.0376612	ENSG00000122435, ENSG00000137760, ENSG00000087995, ENSG00000138050	484	26	16792	5.33757	1	1	1
GOTERM_BP_DIRECT	GO:0090161	Golgi ribbon formation	3	0.443131	0.0382419	ENSG00000135823, ENSG00000123240, ENSG00000117533	484	11	16792	9.46206	1	1	1
GOTERM_BP_DIRECT	GO:0030278	regulation of ossification	3	0.443131	0.0382419	ENSG00000115170, ENSG00000185630, ENSG00000170577	484	11	16792	9.46206	1	1	1
GOTERM_BP_DIRECT	GO:0045944	positive regulation of transcription from RNA polymerase II promoter	39	5.76071	0.0384903	ENSG00000101096, ENSG00000154342, ENSG00000135828, ENSG00000111537, ENSG00000111536, ENSG00000020426, ENSG00000139329, ENSG00000154764, ENSG00000170577, ENSG00000141376, ENSG00000187098, ENSG00000169744, ENSG00000170989, ENSG00000125845, ENSG00000100625, ENSG00000115170, ENSG00000169860, ENSG00000230667, ENSG00000141293, ENSG00000101115, ENSG00000185630, ENSG00000162711, ENSG00000143178, ENSG0000…	484	981	16792	1.37928	1	1	1
GOTERM_BP_DIRECT	GO:0007010	cytoskeleton organization	10	1.4771	0.043332	ENSG00000108091, ENSG00000092421, ENSG00000116141, ENSG00000151914, ENSG00000125864, ENSG00000076321, ENSG00000145362, ENSG00000183785, ENSG00000069020, ENSG00000198947	484	161	16792	2.15492	1	1	1
GOTERM_BP_DIRECT	GO:0030007	cellular potassium ion homeostasis	3	0.443131	0.045033	ENSG00000145349, ENSG00000156113, ENSG00000143153	484	12	16792	8.67355	1	1	1
GOTERM_BP_DIRECT	GO:0031581	hemidesmosome assembly	3	0.443131	0.045033	ENSG00000151914, ENSG00000058085, ENSG00000135862	484	12	16792	8.67355	1	1	1
GOTERM_BP_DIRECT	GO:0032801	receptor catabolic process	3	0.443131	0.045033	ENSG00000196455, ENSG00000069869, ENSG00000089177	484	12	16792	8.67355	1	1	1
GOTERM_BP_DIRECT	GO:0055119	relaxation of cardiac muscle	3	0.443131	0.045033	ENSG00000145349, ENSG00000183023, ENSG00000143153	484	12	16792	8.67355	1	1	1
GOTERM_BP_DIRECT	GO:0007420	brain development	11	1.62482	0.0483902	ENSG00000186716, ENSG00000170989, ENSG00000250722, ENSG00000172264, ENSG00000083720, ENSG00000140836, ENSG00000123983, ENSG00000134198, ENSG00000182621, ENSG00000185920, ENSG00000171634	484	190	16792	2.00861	1	1	1
GOTERM_BP_DIRECT	GO:0007179	transforming growth factor beta receptor signaling pathway	7	1.03397	0.0493967	ENSG00000170315, ENSG00000150093, ENSG00000115170, ENSG00000033170, ENSG00000148498, ENSG00000069702, ENSG00000138379	484	92	16792	2.63978	1	1	1
GOTERM_CC_DIRECT	GO:0005622	intracellular	72	10.6352	7.73275e-08	ENSG00000072422, ENSG00000234284, ENSG00000186716, ENSG00000197054, ENSG00000112964, ENSG00000112249, ENSG00000119283, ENSG00000133704, ENSG00000108506, ENSG00000118197, ENSG00000132010, ENSG00000174652, ENSG00000197933, ENSG00000171466, ENSG00000171469, ENSG00000197857, ENSG00000198429, ENSG00000166510, ENSG00000125846, ENSG00000144681, ENSG00000143153, ENSG00000143157, ENSG00000188868, ENSG0000…	507	1332	18224	1.94296	2.9848e-05	2.98484e-05	2.98484e-05
GOTERM_CC_DIRECT	GO:0005634	nucleus	180	26.5879	0.00307762	ENSG00000079819, ENSG00000130159, ENSG00000109832, ENSG00000143190, ENSG00000162946, ENSG00000198342, ENSG00000112964, ENSG00000152061, ENSG00000150687, ENSG00000174652, ENSG00000197933, ENSG00000170577, ENSG00000169744, ENSG00000100625, ENSG00000141293, ENSG00000136492, ENSG00000162711, ENSG00000162676, ENSG00000182568, ENSG00000180543, ENSG00000257591, ENSG00000214189, ENSG00000162714, ENSG0000…	507	5415	18224	1.19484	0.695715	0.59398	0.59398
GOTERM_CC_DIRECT	GO:0005604	basement membrane	8	1.18168	0.006325	ENSG00000166147, ENSG00000077942, ENSG00000151914, ENSG00000091128, ENSG00000143341, ENSG00000100234, ENSG00000183090, ENSG00000135862	507	79	18224	3.63998	0.913638	0.628312	0.628312
GOTERM_CC_DIRECT	GO:0015629	actin cytoskeleton	14	2.06795	0.00800256	ENSG00000101096, ENSG00000162704, ENSG00000076321, ENSG00000151422, ENSG00000047648, ENSG00000175806, ENSG00000125868, ENSG00000133030, ENSG00000151914, ENSG00000125864, ENSG00000160145, ENSG00000143079, ENSG00000143322, ENSG00000050820	507	218	18224	2.30838	0.955014	0.628312	0.628312
GOTERM_CC_DIRECT	GO:0005578	proteinaceous extracellular matrix	16	2.36337	0.00813876	ENSG00000154342, ENSG00000183628, ENSG00000049323, ENSG00000077942, ENSG00000139329, ENSG00000069702, ENSG00000154764, ENSG00000124749, ENSG00000166147, ENSG00000140470, ENSG00000081148, ENSG00000125848, ENSG00000087116, ENSG00000143196, ENSG00000100234, ENSG00000120332	507	268	18224	2.14596	0.957337	0.628312	0.628312
GOTERM_CC_DIRECT	GO:0044295	axonal growth cone	4	0.590842	0.0127279	ENSG00000125848, ENSG00000148498, ENSG00000187688, ENSG00000185920	507	18	18224	7.98773	0.992878	0.818829	0.818829
GOTERM_CC_DIRECT	GO:0031965	nuclear membrane	13	1.92024	0.0265803	ENSG00000065183, ENSG00000148481, ENSG00000047410, ENSG00000108506, ENSG00000153207, ENSG00000154227, ENSG00000177932, ENSG00000170577, ENSG00000172339, ENSG00000139174, ENSG00000136492, ENSG00000143815, ENSG00000182621	507	229	18224	2.04053	0.99997	1	1
GOTERM_CC_DIRECT	GO:0001527	microfibril	3	0.443131	0.0298717	ENSG00000166147, ENSG00000049323, ENSG00000187720	507	10	18224	10.7834	0.999992	1	1
GOTERM_CC_DIRECT	GO:0042383	sarcolemma	7	1.03397	0.0308531	ENSG00000162692, ENSG00000150093, ENSG00000183023, ENSG00000145362, ENSG00000143153, ENSG00000121361, ENSG00000198947	507	85	18224	2.96016	0.999994	1	1
GOTERM_CC_DIRECT	GO:0098793	presynapse	6	0.886263	0.0323128	ENSG00000154342, ENSG00000103528, ENSG00000141837, ENSG00000102189, ENSG00000154764, ENSG00000143740	507	64	18224	3.36982	0.999997	1	1
GOTERM_CC_DIRECT	GO:0014704	intercalated disc	5	0.738552	0.0357264	ENSG00000145349, ENSG00000150093, ENSG00000183023, ENSG00000145362, ENSG00000143153	507	45	18224	3.99386	0.999999	1	1
GOTERM_CC_DIRECT	GO:0009897	external side of plasma membrane	12	1.77253	0.0358606	ENSG00000168447, ENSG00000159307, ENSG00000162692, ENSG00000170989, ENSG00000117560, ENSG00000240505, ENSG00000150637, ENSG00000150093, ENSG00000111537, ENSG00000254709, ENSG00000069702, ENSG00000134258	507	213	18224	2.02506	0.999999	1	1
GOTERM_CC_DIRECT	GO:0030666	endocytic vesicle membrane	6	0.886263	0.0362322	ENSG00000145349, ENSG00000170315, ENSG00000154342, ENSG00000006125, ENSG00000185920, ENSG00000154764	507	66	18224	3.26771	0.999999	1	1
GOTERM_CC_DIRECT	GO:0043234	protein complex	19	2.8065	0.0388646	ENSG00000110218, ENSG00000186716, ENSG00000196141, ENSG00000049323, ENSG00000073584, ENSG00000116218, ENSG00000028116, ENSG00000111961, ENSG00000135821, ENSG00000047932, ENSG00000073282, ENSG00000198947, ENSG00000118873, ENSG00000145349, ENSG00000187098, ENSG00000101115, ENSG00000148498, ENSG00000104375, ENSG00000162852	507	412	18224	1.65765	1	1	1
GOTERM_CC_DIRECT	GO:0030018	Z disc	8	1.18168	0.0463758	ENSG00000255529, ENSG00000151914, ENSG00000183023, ENSG00000145362, ENSG00000188677, ENSG00000134775, ENSG00000263155, ENSG00000198947	507	118	18224	2.43693	1	1	1
GOTERM_CC_DIRECT	GO:0009986	cell surface	23	3.39734	0.0495309	ENSG00000135318, ENSG00000156687, ENSG00000159307, ENSG00000198121, ENSG00000154342, ENSG00000112964, ENSG00000150093, ENSG00000117525, ENSG00000069702, ENSG00000117533, ENSG00000154764, ENSG00000198947, ENSG00000117586, ENSG00000120337, ENSG00000162692, ENSG00000079112, ENSG00000150637, ENSG00000125845, ENSG00000169860, ENSG00000140479, ENSG00000187688, ENSG00000164136, ENSG00000120332	507	542	18224	1.52533	1	1	1
GOTERM_MF_DIRECT	GO:0003676	nucleic acid binding	65	9.60118	7.58729e-10	ENSG00000234284, ENSG00000109832, ENSG00000197054, ENSG00000112249, ENSG00000198342, ENSG00000140836, ENSG00000118197, ENSG00000132010, ENSG00000174652, ENSG00000197933, ENSG00000171466, ENSG00000171469, ENSG00000197857, ENSG00000198429, ENSG00000125846, ENSG00000136492, ENSG00000257446, ENSG00000101115, ENSG00000143157, ENSG00000162676, ENSG00000188868, ENSG00000257591, ENSG00000214189, ENSG0000…	487	985	16881	2.28742	4.75723e-07	4.75723e-07	4.74964e-07
GOTERM_MF_DIRECT	GO:0046872	metal ion binding	93	13.7371	1.19542e-05	ENSG00000234284, ENSG00000197054, ENSG00000198265, ENSG00000198342, ENSG00000118197, ENSG00000132010, ENSG00000156869, ENSG00000174652, ENSG00000197933, ENSG00000196646, ENSG00000171466, ENSG00000171469, ENSG00000183090, ENSG00000197857, ENSG00000198429, ENSG00000125846, ENSG00000136492, ENSG00000153904, ENSG00000257446, ENSG00000101115, ENSG00000144681, ENSG00000143156, ENSG00000121486, ENSG0000…	487	2069	16881	1.55809	0.00746733	0.00374765	0.00374168
GOTERM_MF_DIRECT	GO:0003677	DNA binding	77	11.3737	4.0023e-05	ENSG00000234284, ENSG00000197054, ENSG00000198342, ENSG00000132010, ENSG00000174652, ENSG00000197933, ENSG00000196646, ENSG00000197857, ENSG00000198429, ENSG00000170577, ENSG00000125846, ENSG00000136492, ENSG00000185630, ENSG00000108384, ENSG00000143157, ENSG00000182568, ENSG00000188868, ENSG00000257591, ENSG00000214189, ENSG00000115507, ENSG00000162714, ENSG00000197044, ENSG00000196110, ENSG0000…	487	1674	16881	1.59443	0.0247827	0.0083648	0.00835146
GOTERM_MF_DIRECT	GO:0005096	GTPase activator activity	18	2.65879	0.00308852	ENSG00000186716, ENSG00000152061, ENSG00000137727, ENSG00000241484, ENSG00000248405, ENSG00000204172, ENSG00000067208, ENSG00000066933, ENSG00000131374, ENSG00000137962, ENSG00000047648, ENSG00000118873, ENSG00000196935, ENSG00000116991, ENSG00000143248, ENSG00000145348, ENSG00000188559, ENSG00000160145, ENSG00000182621	487	279	16881	2.23634	0.856224	0.484126	0.483354
GOTERM_MF_DIRECT	GO:0005524	ATP binding	60	8.86263	0.00810567	ENSG00000109832, ENSG00000186716, ENSG00000198265, ENSG00000112249, ENSG00000118193, ENSG00000118197, ENSG00000186283, ENSG00000081026, ENSG00000169860, ENSG00000139163, ENSG00000136492, ENSG00000123983, ENSG00000162711, ENSG00000121361, ENSG00000143153, ENSG00000108384, ENSG00000143156, ENSG00000136628, ENSG00000152495, ENSG00000185418, ENSG00000135778, ENSG00000178105, ENSG00000137996, ENSG0000…	487	1495	16881	1.39117	0.993921	1	1
GOTERM_MF_DIRECT	GO:0005200	structural constituent of cytoskeleton	9	1.32939	0.0141518	ENSG00000108091, ENSG00000171877, ENSG00000079819, ENSG00000129595, ENSG00000162704, ENSG00000125864, ENSG00000145362, ENSG00000183785, ENSG00000198947	487	110	16881	2.83608	0.999869	1	1
GOTERM_MF_DIRECT	GO:0005178	integrin binding	8	1.18168	0.0319929	ENSG00000162692, ENSG00000079112, ENSG00000166147, ENSG00000150637, ENSG00000077942, ENSG00000150093, ENSG00000151914, ENSG00000120332	487	105	16881	2.64101	1	1	1
GOTERM_MF_DIRECT	GO:0031402	sodium ion binding	3	0.443131	0.0451073	ENSG00000185052, ENSG00000188467, ENSG00000143153	487	12	16881	8.66581	1	1	1

## Sheet: mac_THP-1-mac_a2b
Category		Term	Count	%	PValue	Genes	List Total	Pop Hits	Pop Total	Fold Enrichment	Bonferroni	Benjamini	FDR
GOTERM_BP_DIRECT	GO:0007062	sister chromatid cohesion	17	1.48992	7.41582e-05	ENSG00000152253, ENSG00000153201, ENSG00000090273, ENSG00000154473, ENSG00000197771, ENSG00000147099, ENSG00000074054, ENSG00000175279, ENSG00000086827, ENSG00000169679, ENSG00000186871, ENSG00000134690, ENSG00000251503, ENSG00000145241, ENSG00000179051, ENSG00000142856, ENSG00000166579	869	103	16792	3.18929	0.200895	0.224254	0.22418
GOTERM_BP_DIRECT	GO:0006397	mRNA processing	22	1.92813	0.000383318	ENSG00000172062, ENSG00000133226, ENSG00000214575, ENSG00000147140, ENSG00000167281, ENSG00000213516, ENSG00000120948, ENSG00000197976, ENSG00000111196, ENSG00000205571, ENSG00000175756, ENSG00000117751, ENSG00000100109, ENSG00000116560, ENSG00000116350, ENSG00000125944, ENSG00000181817, ENSG00000183431, ENSG00000132819, ENSG00000121774, ENSG00000054118, ENSG00000106355	869	179	16792	2.37494	0.686318	0.373298	0.373174
GOTERM_BP_DIRECT	GO:0035196	production of miRNAs involved in gene silencing by miRNA	5	0.438212	0.000419831	ENSG00000100697, ENSG00000163877, ENSG00000126070, ENSG00000092847, ENSG00000134698	869	8	16792	12.0771	0.719122	0.373298	0.373174
GOTERM_BP_DIRECT	GO:0001921	positive regulation of receptor recycling	6	0.525855	0.00049378	ENSG00000085832, ENSG00000117298, ENSG00000182718, ENSG00000049245, ENSG00000073969, ENSG00000145335	869	14	16792	8.28144	0.775428	0.373298	0.373174
GOTERM_BP_DIRECT	GO:0051301	cell division	34	2.97984	0.000648017	ENSG00000090273, ENSG00000198783, ENSG00000180198, ENSG00000197771, ENSG00000136014, ENSG00000118971, ENSG00000198924, ENSG00000086827, ENSG00000160072, ENSG00000134690, ENSG00000251503, ENSG00000162413, ENSG00000186522, ENSG00000070831, ENSG00000152253, ENSG00000175470, ENSG00000154473, ENSG00000005156, ENSG00000175279, ENSG00000074054, ENSG00000136122, ENSG00000248333, ENSG00000169679, ENSG0000…	869	350	16792	1.87713	0.859175	0.391921	0.391791
GOTERM_BP_DIRECT	GO:0036297	interstrand cross-link repair	10	0.876424	0.000803485	ENSG00000181544, ENSG00000162607, ENSG00000251503, ENSG00000117748, ENSG00000111247, ENSG00000241563, ENSG00000175279, ENSG00000185379, ENSG00000162585, ENSG00000198924	869	49	16792	3.94354	0.912026	0.404957	0.404823
GOTERM_BP_DIRECT	GO:0022604	regulation of cell morphogenesis	7	0.613497	0.0014237	ENSG00000165650, ENSG00000077549, ENSG00000197296, ENSG00000147130, ENSG00000146463, ENSG00000163867, ENSG00000134698	869	25	16792	5.41054	0.986544	0.615038	0.614835
GOTERM_BP_DIRECT	GO:0008380	RNA splicing	19	1.66521	0.00238026	ENSG00000133226, ENSG00000147140, ENSG00000116954, ENSG00000167281, ENSG00000213516, ENSG00000120948, ENSG00000197976, ENSG00000111196, ENSG00000117751, ENSG00000060688, ENSG00000139343, ENSG00000100109, ENSG00000116560, ENSG00000116350, ENSG00000181817, ENSG00000051596, ENSG00000183431, ENSG00000132819, ENSG00000054118	869	166	16792	2.21171	0.999258	0.899737	0.89944
GOTERM_BP_DIRECT	GO:0000184	nuclear-transcribed mRNA catabolic process, nonsense-mediated decay	15	1.31464	0.00333261	ENSG00000198034, ENSG00000134419, ENSG00000112306, ENSG00000104408, ENSG00000111196, ENSG00000189266, ENSG00000168028, ENSG00000162385, ENSG00000171824, ENSG00000116251, ENSG00000189369, ENSG00000186468, ENSG00000161970, ENSG00000182774, ENSG00000142676	869	119	16792	2.43572	0.999959	0.957575	0.957259
GOTERM_BP_DIRECT	GO:0000956	nuclear-transcribed mRNA catabolic process	5	0.438212	0.00348324	ENSG00000053372, ENSG00000171824, ENSG00000092847, ENSG00000054118, ENSG00000106355	869	13	16792	7.43206	0.999974	0.957575	0.957259
GOTERM_BP_DIRECT	GO:0031054	pre-miRNA processing	5	0.438212	0.00348324	ENSG00000100697, ENSG00000131914, ENSG00000126070, ENSG00000092847, ENSG00000134698	869	13	16792	7.43206	0.999974	0.957575	0.957259
GOTERM_BP_DIRECT	GO:0035280	miRNA loading onto RISC involved in gene silencing by miRNA	4	0.35057	0.00411826	ENSG00000100697, ENSG00000126070, ENSG00000092847, ENSG00000134698	869	7	16792	11.0419	0.999996	1	1
GOTERM_BP_DIRECT	GO:0007067	mitotic nuclear division	24	2.10342	0.00489933	ENSG00000152253, ENSG00000175470, ENSG00000090273, ENSG00000198783, ENSG00000180198, ENSG00000197771, ENSG00000198642, ENSG00000136014, ENSG00000175279, ENSG00000136122, ENSG00000198924, ENSG00000248333, ENSG00000086827, ENSG00000169679, ENSG00000116670, ENSG00000186871, ENSG00000037474, ENSG00000101447, ENSG00000251503, ENSG00000162413, ENSG00000145241, ENSG00000179051, ENSG00000142856, ENSG0000…	869	248	16792	1.87	1	1	1
GOTERM_BP_DIRECT	GO:0090526	regulation of gluconeogenesis involved in cellular glucose homeostasis	3	0.262927	0.00773188	ENSG00000153201, ENSG00000130766, ENSG00000147162	869	3	16792	19.3234	1	1	1
GOTERM_BP_DIRECT	GO:0051056	regulation of small GTPase mediated signal transduction	15	1.31464	0.00948607	ENSG00000113319, ENSG00000076864, ENSG00000170471, ENSG00000047365, ENSG00000197555, ENSG00000130052, ENSG00000038382, ENSG00000204084, ENSG00000131089, ENSG00000079482, ENSG00000138640, ENSG00000160293, ENSG00000102302, ENSG00000070831, ENSG00000164741	869	134	16792	2.16306	1	1	1
GOTERM_BP_DIRECT	GO:0043433	negative regulation of sequence-specific DNA binding transcription factor activity	9	0.788782	0.0116566	ENSG00000196924, ENSG00000049768, ENSG00000116670, ENSG00000186827, ENSG00000091831, ENSG00000153879, ENSG00000004487, ENSG00000117318, ENSG00000142655	869	60	16792	2.8985	1	1	1
GOTERM_BP_DIRECT	GO:0016310	phosphorylation	12	1.05171	0.0141273	ENSG00000131730, ENSG00000145725, ENSG00000133216, ENSG00000120137, ENSG00000198793, ENSG00000162408, ENSG00000157881, ENSG00000044446, ENSG00000198964, ENSG00000179988, ENSG00000172456, ENSG00000102144	869	100	16792	2.3188	1	1	1
GOTERM_BP_DIRECT	GO:0090625	mRNA cleavage involved in gene silencing by siRNA	3	0.262927	0.0149344	ENSG00000126070, ENSG00000092847, ENSG00000134698	869	4	16792	14.4925	1	1	1
GOTERM_BP_DIRECT	GO:0045333	cellular respiration	5	0.438212	0.0209942	ENSG00000124279, ENSG00000138399, ENSG00000023228, ENSG00000004864, ENSG00000118246	869	21	16792	4.6008	1	1	1
GOTERM_BP_DIRECT	GO:0035023	regulation of Rho protein signal transduction	10	0.876424	0.0236546	ENSG00000114790, ENSG00000074964, ENSG00000113319, ENSG00000180263, ENSG00000160293, ENSG00000102302, ENSG00000038382, ENSG00000164741, ENSG00000131089, ENSG00000142632	869	81	16792	2.3856	1	1	1
GOTERM_BP_DIRECT	GO:0090027	negative regulation of monocyte chemotaxis	3	0.262927	0.0240423	ENSG00000158747, ENSG00000166923, ENSG00000270136	869	5	16792	11.594	1	1	1
GOTERM_BP_DIRECT	GO:1902261	positive regulation of delayed rectifier potassium channel activity	3	0.262927	0.0240423	ENSG00000118507, ENSG00000158286, ENSG00000175206	869	5	16792	11.594	1	1	1
GOTERM_BP_DIRECT	GO:0010637	negative regulation of mitochondrial fusion	3	0.262927	0.0240423	ENSG00000090432, ENSG00000162600, ENSG00000176171	869	5	16792	11.594	1	1	1
GOTERM_BP_DIRECT	GO:0035279	mRNA cleavage involved in gene silencing by miRNA	3	0.262927	0.0240423	ENSG00000126070, ENSG00000092847, ENSG00000134698	869	5	16792	11.594	1	1	1
GOTERM_BP_DIRECT	GO:0006312	mitotic recombination	4	0.35057	0.0266787	ENSG00000251503, ENSG00000241563, ENSG00000175279, ENSG00000185379	869	13	16792	5.94565	1	1	1
GOTERM_BP_DIRECT	GO:0043547	positive regulation of GTPase activity	41	3.59334	0.0272003	ENSG00000070785, ENSG00000074964, ENSG00000180198, ENSG00000076864, ENSG00000113319, ENSG00000198223, ENSG00000047365, ENSG00000172575, ENSG00000177606, ENSG00000130052, ENSG00000131584, ENSG00000131089, ENSG00000185291, ENSG00000079482, ENSG00000083520, ENSG00000138670, ENSG00000088538, ENSG00000160293, ENSG00000102302, ENSG00000142669, ENSG00000162552, ENSG00000166579, ENSG00000162434, ENSG0000…	869	565	16792	1.40223	1	1	1
GOTERM_BP_DIRECT	GO:0006906	vesicle fusion	8	0.701139	0.0317418	ENSG00000102362, ENSG00000079950, ENSG00000049245, ENSG00000117758, ENSG00000254995, ENSG00000142765, ENSG00000124222, ENSG00000124333	869	59	16792	2.62012	1	1	1
GOTERM_BP_DIRECT	GO:0047496	vesicle transport along microtubule	4	0.35057	0.0326786	ENSG00000172575, ENSG00000166579, ENSG00000067606, ENSG00000124333	869	14	16792	5.52096	1	1	1
GOTERM_BP_DIRECT	GO:0006338	chromatin remodeling	10	0.876424	0.0332887	ENSG00000049768, ENSG00000178028, ENSG00000085224, ENSG00000091831, ENSG00000162601, ENSG00000117713, ENSG00000116478, ENSG00000163104, ENSG00000162521, ENSG00000142599	869	86	16792	2.2469	1	1	1
GOTERM_BP_DIRECT	GO:0048263	determination of dorsal identity	3	0.262927	0.0348399	ENSG00000158747, ENSG00000166923, ENSG00000270136	869	6	16792	9.66168	1	1	1
GOTERM_BP_DIRECT	GO:0006281	DNA repair	20	1.75285	0.0360801	ENSG00000048028, ENSG00000178028, ENSG00000198793, ENSG00000147140, ENSG00000107949, ENSG00000111445, ENSG00000111247, ENSG00000132781, ENSG00000005156, ENSG00000175279, ENSG00000116663, ENSG00000101868, ENSG00000085224, ENSG00000169188, ENSG00000251503, ENSG00000121988, ENSG00000092853, ENSG00000185379, ENSG00000178295, ENSG00000135090	869	235	16792	1.64454	1	1	1
GOTERM_BP_DIRECT	GO:0090307	mitotic spindle assembly	6	0.525855	0.0364199	ENSG00000204899, ENSG00000196924, ENSG00000083535, ENSG00000074054, ENSG00000183765, ENSG00000116213	869	36	16792	3.22056	1	1	1
GOTERM_BP_DIRECT	GO:0030036	actin cytoskeleton organization	13	1.13935	0.036834	ENSG00000131697, ENSG00000077549, ENSG00000180263, ENSG00000139734, ENSG00000079482, ENSG00000158195, ENSG00000187961, ENSG00000159023, ENSG00000204138, ENSG00000183386, ENSG00000102302, ENSG00000070831, ENSG00000164741	869	130	16792	1.93234	1	1	1
GOTERM_BP_DIRECT	GO:0006886	intracellular protein transport	20	1.75285	0.0374235	ENSG00000102362, ENSG00000068354, ENSG00000006715, ENSG00000170011, ENSG00000117758, ENSG00000138802, ENSG00000006125, ENSG00000145348, ENSG00000168434, ENSG00000079950, ENSG00000184575, ENSG00000002919, ENSG00000166747, ENSG00000188419, ENSG00000101310, ENSG00000107651, ENSG00000254995, ENSG00000142765, ENSG00000124222, ENSG00000073969	869	236	16792	1.63757	1	1	1
GOTERM_BP_DIRECT	GO:0000375	RNA splicing, via transesterification reactions	5	0.438212	0.0377306	ENSG00000060688, ENSG00000133226, ENSG00000116350, ENSG00000183431, ENSG00000188529	869	25	16792	3.86467	1	1	1
GOTERM_BP_DIRECT	GO:0042273	ribosomal large subunit biogenesis	5	0.438212	0.0377306	ENSG00000073536, ENSG00000188976, ENSG00000161970, ENSG00000142676, ENSG00000173545	869	25	16792	3.86467	1	1	1
GOTERM_BP_DIRECT	GO:0006412	translation	21	1.84049	0.0392831	ENSG00000214575, ENSG00000090263, ENSG00000155287, ENSG00000122140, ENSG00000198034, ENSG00000134419, ENSG00000112306, ENSG00000242485, ENSG00000116898, ENSG00000114686, ENSG00000004864, ENSG00000168028, ENSG00000145736, ENSG00000144659, ENSG00000116251, ENSG00000169100, ENSG00000186468, ENSG00000161970, ENSG00000182774, ENSG00000140598, ENSG00000142676	869	253	16792	1.60392	1	1	1
GOTERM_BP_DIRECT	GO:0006369	termination of RNA polymerase II transcription	8	0.701139	0.0464588	ENSG00000162385, ENSG00000133226, ENSG00000139343, ENSG00000116350, ENSG00000160075, ENSG00000181817, ENSG00000051596, ENSG00000130772	869	64	16792	2.41542	1	1	1
GOTERM_BP_DIRECT	GO:0048593	camera-type eye morphogenesis	4	0.35057	0.0465831	ENSG00000171812, ENSG00000157933, ENSG00000133216, ENSG00000116688	869	16	16792	4.83084	1	1	1
GOTERM_BP_DIRECT	GO:0019388	galactose catabolic process	3	0.262927	0.0471286	ENSG00000154330, ENSG00000117308, ENSG00000079739	869	7	16792	8.28144	1	1	1
GOTERM_BP_DIRECT	GO:0035194	posttranscriptional gene silencing by RNA	3	0.262927	0.0471286	ENSG00000126070, ENSG00000092847, ENSG00000134698	869	7	16792	8.28144	1	1	1
GOTERM_BP_DIRECT	GO:0031297	replication fork processing	5	0.438212	0.0482944	ENSG00000085224, ENSG00000121988, ENSG00000251503, ENSG00000241563, ENSG00000175279	869	27	16792	3.5784	1	1	1
GOTERM_BP_DIRECT	GO:0031032	actomyosin structure organization	5	0.438212	0.0482944	ENSG00000171877, ENSG00000079819, ENSG00000139926, ENSG00000159023, ENSG00000133026	869	27	16792	3.5784	1	1	1
GOTERM_BP_DIRECT	GO:0006468	protein phosphorylation	33	2.8922	0.0495377	ENSG00000196182, ENSG00000175087, ENSG00000067177, ENSG00000198648, ENSG00000138399, ENSG00000078142, ENSG00000145736, ENSG00000168038, ENSG00000124279, ENSG00000147133, ENSG00000106123, ENSG00000162434, ENSG00000111725, ENSG00000105204, ENSG00000198793, ENSG00000044446, ENSG00000038382, ENSG00000157764, ENSG00000020633, ENSG00000118246, ENSG00000067606, ENSG00000248333, ENSG00000114670, ENSG0000…	869	456	16792	1.3984	1	1	1
GOTERM_CC_DIRECT	GO:0005829	cytosol	232	20.333	7.44385e-07	ENSG00000006715, ENSG00000092871, ENSG00000113657, ENSG00000152348, ENSG00000040199, ENSG00000133026, ENSG00000116127, ENSG00000131089, ENSG00000142784, ENSG00000164695, ENSG00000162390, ENSG00000089220, ENSG00000107651, ENSG00000070831, ENSG00000013016, ENSG00000025800, ENSG00000104497, ENSG00000175470, ENSG00000126067, ENSG00000224051, ENSG00000116478, ENSG00000168028, ENSG00000184292, ENSG0000…	951	3315	18224	1.34112	0.000443555	0.000443654	0.000442909
GOTERM_CC_DIRECT	GO:0005654	nucleoplasm	197	17.2656	3.56724e-06	ENSG00000116809, ENSG00000092871, ENSG00000188786, ENSG00000128915, ENSG00000090686, ENSG00000146463, ENSG00000187699, ENSG00000178295, ENSG00000025800, ENSG00000126067, ENSG00000116478, ENSG00000186350, ENSG00000168028, ENSG00000100219, ENSG00000169598, ENSG00000116350, ENSG00000145241, ENSG00000092853, ENSG00000183520, ENSG00000187325, ENSG00000183765, ENSG00000121058, ENSG00000196182, ENSG0000…	951	2784	18224	1.356	0.00212382	0.00106304	0.00106125
GOTERM_CC_DIRECT	GO:0005737	cytoplasm	329	28.8344	2.95252e-05	ENSG00000214114, ENSG00000139926, ENSG00000092871, ENSG00000113657, ENSG00000167281, ENSG00000040199, ENSG00000133026, ENSG00000116127, ENSG00000131089, ENSG00000100109, ENSG00000162390, ENSG00000087842, ENSG00000090686, ENSG00000146463, ENSG00000142669, ENSG00000107651, ENSG00000070831, ENSG00000215440, ENSG00000013016, ENSG00000025800, ENSG00000126067, ENSG00000180263, ENSG00000224051, ENSG0000…	951	5222	18224	1.20732	0.0174434	0.00586568	0.00585583
GOTERM_CC_DIRECT	GO:0005739	mitochondrion	94	8.23839	0.00219733	ENSG00000214114, ENSG00000213463, ENSG00000197296, ENSG00000105755, ENSG00000067992, ENSG00000130119, ENSG00000007923, ENSG00000137944, ENSG00000173641, ENSG00000179988, ENSG00000133026, ENSG00000138399, ENSG00000116688, ENSG00000196449, ENSG00000148848, ENSG00000168653, ENSG00000162396, ENSG00000169860, ENSG00000169100, ENSG00000169188, ENSG00000054523, ENSG00000124279, ENSG00000090686, ENSG0000…	951	1331	18224	1.35336	0.730462	0.273308	0.272849
GOTERM_CC_DIRECT	GO:0005730	nucleolus	65	5.69676	0.00239545	ENSG00000130038, ENSG00000130119, ENSG00000136014, ENSG00000139921, ENSG00000083520, ENSG00000121766, ENSG00000100109, ENSG00000134152, ENSG00000169188, ENSG00000131914, ENSG00000048028, ENSG00000131732, ENSG00000089050, ENSG00000113649, ENSG00000147140, ENSG00000224051, ENSG00000099290, ENSG00000171824, ENSG00000169598, ENSG00000101868, ENSG00000157184, ENSG00000138162, ENSG00000188976, ENSG0000…	951	857	18224	1.45344	0.760548	0.273308	0.272849
GOTERM_CC_DIRECT	GO:0016020	membrane	144	12.6205	0.00275142	ENSG00000102362, ENSG00000130038, ENSG00000006715, ENSG00000092871, ENSG00000182718, ENSG00000198223, ENSG00000130150, ENSG00000196449, ENSG00000083520, ENSG00000117298, ENSG00000157193, ENSG00000162551, ENSG00000162391, ENSG00000102007, ENSG00000184588, ENSG00000102003, ENSG00000070831, ENSG00000101310, ENSG00000162434, ENSG00000025800, ENSG00000126067, ENSG00000135218, ENSG00000147140, ENSG0000…	951	2200	18224	1.2543	0.806428	0.273308	0.272849
GOTERM_CC_DIRECT	GO:0019898	extrinsic component of membrane	12	1.05171	0.00343943	ENSG00000102362, ENSG00000171877, ENSG00000079819, ENSG00000147065, ENSG00000147164, ENSG00000159023, ENSG00000048707, ENSG00000002919, ENSG00000088179, ENSG00000198648, ENSG00000182732, ENSG00000011422	951	82	18224	2.80434	0.871706	0.292843	0.292351
GOTERM_CC_DIRECT	GO:0070578	RISC-loading complex	4	0.35057	0.0042191	ENSG00000100697, ENSG00000126070, ENSG00000092847, ENSG00000134698	951	7	18224	10.9503	0.919533	0.314323	0.313795
GOTERM_CC_DIRECT	GO:0000777	condensed chromosome kinetochore	12	1.05171	0.00543899	ENSG00000169679, ENSG00000152253, ENSG00000186871, ENSG00000154473, ENSG00000251503, ENSG00000145241, ENSG00000142856, ENSG00000175279, ENSG00000074054, ENSG00000166579, ENSG00000163875, ENSG00000086827	951	87	18224	2.64317	0.961245	0.360182	0.359578
GOTERM_CC_DIRECT	GO:0043240	Fanconi anaemia nuclear complex	5	0.438212	0.00631036	ENSG00000181544, ENSG00000251503, ENSG00000241563, ENSG00000175279, ENSG00000162585	951	15	18224	6.38766	0.977014	0.376097	0.375466
GOTERM_CC_DIRECT	GO:0005813	centrosome	35	3.06748	0.0091849	ENSG00000102362, ENSG00000157933, ENSG00000149292, ENSG00000127481, ENSG00000135541, ENSG00000116127, ENSG00000130695, ENSG00000204899, ENSG00000160050, ENSG00000116044, ENSG00000158161, ENSG00000162413, ENSG00000164118, ENSG00000184588, ENSG00000152082, ENSG00000107890, ENSG00000185379, ENSG00000178295, ENSG00000166579, ENSG00000184205, ENSG00000169504, ENSG00000127423, ENSG00000075702, ENSG0000…	951	426	18224	1.57442	0.995911	0.470005	0.469217
GOTERM_CC_DIRECT	GO:0030027	lamellipodium	17	1.48992	0.00946319	ENSG00000077549, ENSG00000132855, ENSG00000090020, ENSG00000099204, ENSG00000173482, ENSG00000180263, ENSG00000113657, ENSG00000133026, ENSG00000130055, ENSG00000187164, ENSG00000162493, ENSG00000158195, ENSG00000204138, ENSG00000102302, ENSG00000142669, ENSG00000088992, ENSG00000124333	951	160	18224	2.03607	0.996541	0.470005	0.469217
GOTERM_CC_DIRECT	GO:0000139	Golgi membrane	45	3.94391	0.0110698	ENSG00000092871, ENSG00000076864, ENSG00000128294, ENSG00000172575, ENSG00000117758, ENSG00000198964, ENSG00000171365, ENSG00000111670, ENSG00000185090, ENSG00000136699, ENSG00000164597, ENSG00000168434, ENSG00000182022, ENSG00000070831, ENSG00000101310, ENSG00000107651, ENSG00000073969, ENSG00000142687, ENSG00000176022, ENSG00000103043, ENSG00000177674, ENSG00000124164, ENSG00000177951, ENSG0000…	951	591	18224	1.45911	0.998686	0.507506	0.506654
GOTERM_CC_DIRECT	GO:0016442	RISC complex	4	0.35057	0.0170067	ENSG00000100697, ENSG00000126070, ENSG00000092847, ENSG00000134698	951	11	18224	6.96836	0.999964	0.6878	0.686645
GOTERM_CC_DIRECT	GO:0000785	chromatin	11	0.964067	0.0173104	ENSG00000116044, ENSG00000116560, ENSG00000101868, ENSG00000198157, ENSG00000179222, ENSG00000117748, ENSG00000198830, ENSG00000104408, ENSG00000078900, ENSG00000116478, ENSG00000118971	951	89	18224	2.36846	0.99997	0.6878	0.686645
GOTERM_CC_DIRECT	GO:0071821	FANCM-MHF complex	3	0.262927	0.0244312	ENSG00000251503, ENSG00000241563, ENSG00000175279	951	5	18224	11.4978	1	0.88801	0.88652
GOTERM_CC_DIRECT	GO:0035145	exon-exon junction complex	5	0.438212	0.0253291	ENSG00000166024, ENSG00000162385, ENSG00000083544, ENSG00000111196, ENSG00000054118	951	22	18224	4.35522	1	0.88801	0.88652
GOTERM_CC_DIRECT	GO:0030122	AP-2 adaptor complex	4	0.35057	0.0272766	ENSG00000085832, ENSG00000157978, ENSG00000118473, ENSG00000006125	951	13	18224	5.8963	1	0.903158	0.901642
GOTERM_CC_DIRECT	GO:0035327	transcriptionally active chromatin	5	0.438212	0.0294317	ENSG00000171824, ENSG00000128915, ENSG00000091831, ENSG00000198677, ENSG00000117115	951	23	18224	4.16587	1	0.923227	0.921678
GOTERM_CC_DIRECT	GO:0005856	cytoskeleton	29	2.54163	0.0322159	ENSG00000079819, ENSG00000139926, ENSG00000197555, ENSG00000198648, ENSG00000173801, ENSG00000171877, ENSG00000158062, ENSG00000088179, ENSG00000102302, ENSG00000127603, ENSG00000189337, ENSG00000186522, ENSG00000162434, ENSG00000131697, ENSG00000154114, ENSG00000077549, ENSG00000104312, ENSG00000069424, ENSG00000147065, ENSG00000180263, ENSG00000136026, ENSG00000001631, ENSG00000116133, ENSG0000…	951	371	18224	1.49792	1	0.959353	0.957743
GOTERM_CC_DIRECT	GO:0035068	micro-ribonucleoprotein complex	3	0.262927	0.0353928	ENSG00000126070, ENSG00000092847, ENSG00000134698	951	6	18224	9.58149	1	0.959353	0.957743
GOTERM_CC_DIRECT	GO:0015629	actin cytoskeleton	19	1.66521	0.0365638	ENSG00000077549, ENSG00000113649, ENSG00000099204, ENSG00000214717, ENSG00000173641, ENSG00000133026, ENSG00000173801, ENSG00000078053, ENSG00000079482, ENSG00000196924, ENSG00000058453, ENSG00000162572, ENSG00000158195, ENSG00000187961, ENSG00000000938, ENSG00000122786, ENSG00000079739, ENSG00000169504, ENSG00000145335	951	218	18224	1.67017	1	0.959353	0.957743
GOTERM_CC_DIRECT	GO:0030496	midbody	13	1.13935	0.037022	ENSG00000182718, ENSG00000198642, ENSG00000133026, ENSG00000078142, ENSG00000138670, ENSG00000164695, ENSG00000134690, ENSG00000164118, ENSG00000179051, ENSG00000100154, ENSG00000070831, ENSG00000090889, ENSG00000169504	951	129	18224	1.93115	1	0.959353	0.957743
GOTERM_CC_DIRECT	GO:0043231	intracellular membrane-bounded organelle	40	3.5057	0.038685	ENSG00000215784, ENSG00000049245, ENSG00000179889, ENSG00000121766, ENSG00000006530, ENSG00000168434, ENSG00000169188, ENSG00000187699, ENSG00000221978, ENSG00000101310, ENSG00000124333, ENSG00000177674, ENSG00000130940, ENSG00000165806, ENSG00000111666, ENSG00000196550, ENSG00000198157, ENSG00000040487, ENSG00000116954, ENSG00000244038, ENSG00000167191, ENSG00000157764, ENSG00000006125, ENSG0000…	951	558	18224	1.37369	1	0.960678	0.959066
GOTERM_CC_DIRECT	GO:0015030	Cajal body	7	0.613497	0.0483757	ENSG00000105202, ENSG00000172062, ENSG00000128915, ENSG00000181817, ENSG00000173641, ENSG00000121058, ENSG00000205571	951	51	18224	2.63021	1	1	1
GOTERM_CC_DIRECT	GO:0000932	cytoplasmic mRNA processing body	9	0.788782	0.0499118	ENSG00000064726, ENSG00000189266, ENSG00000198492, ENSG00000214575, ENSG00000131914, ENSG00000126070, ENSG00000092847, ENSG00000134698, ENSG00000134644	951	78	18224	2.21111	1	1	1
GOTERM_MF_DIRECT	GO:0044822	poly(A) RNA binding	94	8.23839	1.19748e-05	ENSG00000133226, ENSG00000048991, ENSG00000130119, ENSG00000180098, ENSG00000182718, ENSG00000117419, ENSG00000171262, ENSG00000177606, ENSG00000117614, ENSG00000120948, ENSG00000137944, ENSG00000197976, ENSG00000138399, ENSG00000111196, ENSG00000060688, ENSG00000121766, ENSG00000116560, ENSG00000182481, ENSG00000124279, ENSG00000162437, ENSG00000089220, ENSG00000107651, ENSG00000198492, ENSG0000…	895	1129	16881	1.5704	0.0115011	0.0115676	0.0115676
GOTERM_MF_DIRECT	GO:0005515	protein binding	520	45.5741	0.000120022	ENSG00000116809, ENSG00000214114, ENSG00000139926, ENSG00000092871, ENSG00000113657, ENSG00000116922, ENSG00000040199, ENSG00000133026, ENSG00000100109, ENSG00000011638, ENSG00000169100, ENSG00000128915, ENSG00000146463, ENSG00000101310, ENSG00000089220, ENSG00000070831, ENSG00000025800, ENSG00000135218, ENSG00000113649, ENSG00000111224, ENSG00000069509, ENSG00000168028, ENSG00000100219, ENSG0000…	895	8785	16881	1.11644	0.109478	0.0579704	0.0579704
GOTERM_MF_DIRECT	GO:0001047	core promoter binding	10	0.876424	0.00631494	ENSG00000049768, ENSG00000100219, ENSG00000116560, ENSG00000188786, ENSG00000147140, ENSG00000008405, ENSG00000007968, ENSG00000092847, ENSG00000116478, ENSG00000174953	895	64	16881	2.9471	0.997801	1	1
GOTERM_MF_DIRECT	GO:0008017	microtubule binding	21	1.84049	0.00732905	ENSG00000124164, ENSG00000006715, ENSG00000248905, ENSG00000156232, ENSG00000074054, ENSG00000176049, ENSG00000118473, ENSG00000001631, ENSG00000198836, ENSG00000117245, ENSG00000101447, ENSG00000105270, ENSG00000054523, ENSG00000179051, ENSG00000101146, ENSG00000127603, ENSG00000166579, ENSG00000090889, ENSG00000142655, ENSG00000166503, ENSG00000145335	895	208	16881	1.90428	0.99918	1	1
GOTERM_MF_DIRECT	GO:0005085	guanyl-nucleotide exchange factor activity	14	1.22699	0.00963103	ENSG00000070785, ENSG00000113319, ENSG00000180263, ENSG00000172575, ENSG00000111785, ENSG00000038382, ENSG00000131089, ENSG00000116641, ENSG00000083520, ENSG00000138670, ENSG00000088538, ENSG00000160293, ENSG00000102302, ENSG00000100099	895	118	16881	2.2378	0.999913	1	1
GOTERM_MF_DIRECT	GO:0005484	SNAP receptor activity	7	0.613497	0.0158478	ENSG00000177951, ENSG00000079950, ENSG00000049245, ENSG00000117758, ENSG00000254995, ENSG00000124222, ENSG00000124333	895	39	16881	3.38539	1	1	1
GOTERM_MF_DIRECT	GO:0019901	protein kinase binding	31	2.71691	0.016527	ENSG00000157933, ENSG00000121380, ENSG00000092871, ENSG00000198648, ENSG00000173801, ENSG00000118971, ENSG00000132906, ENSG00000221978, ENSG00000145730, ENSG00000070831, ENSG00000089220, ENSG00000073969, ENSG00000111725, ENSG00000147065, ENSG00000198793, ENSG00000115966, ENSG00000008405, ENSG00000136122, ENSG00000167191, ENSG00000067606, ENSG00000140199, ENSG00000166068, ENSG00000100219, ENSG0000…	895	376	16881	1.55507	1	1	1
GOTERM_MF_DIRECT	GO:0031267	small GTPase binding	5	0.438212	0.0191895	ENSG00000196924, ENSG00000180263, ENSG00000179051, ENSG00000102302, ENSG00000157764	895	20	16881	4.71536	1	1	1
GOTERM_MF_DIRECT	GO:0035064	methylated histone binding	8	0.701139	0.02103	ENSG00000015171, ENSG00000179304, ENSG00000116273, ENSG00000196363, ENSG00000085224, ENSG00000071243, ENSG00000083544, ENSG00000172943	895	53	16881	2.84701	1	1	1
GOTERM_MF_DIRECT	GO:0003779	actin binding	24	2.10342	0.0226299	ENSG00000175130, ENSG00000079819, ENSG00000077549, ENSG00000248905, ENSG00000147065, ENSG00000156232, ENSG00000099204, ENSG00000103942, ENSG00000197530, ENSG00000170011, ENSG00000139734, ENSG00000117228, ENSG00000133026, ENSG00000079482, ENSG00000058453, ENSG00000158195, ENSG00000159023, ENSG00000204138, ENSG00000183386, ENSG00000147202, ENSG00000147364, ENSG00000127603, ENSG00000122786, ENSG0000…	895	278	16881	1.62833	1	1	1
GOTERM_MF_DIRECT	GO:0003690	double-stranded DNA binding	10	0.876424	0.027125	ENSG00000060138, ENSG00000120832, ENSG00000102309, ENSG00000008405, ENSG00000111247, ENSG00000241563, ENSG00000175279, ENSG00000069812, ENSG00000185379, ENSG00000120948	895	81	16881	2.32857	1	1	1
GOTERM_MF_DIRECT	GO:0019894	kinesin binding	6	0.525855	0.0357744	ENSG00000058453, ENSG00000157193, ENSG00000101447, ENSG00000054523, ENSG00000166747, ENSG00000145335	895	35	16881	3.23339	1	1	1
GOTERM_MF_DIRECT	GO:0003723	RNA binding	40	3.5057	0.0364554	ENSG00000162408, ENSG00000134419, ENSG00000130813, ENSG00000167281, ENSG00000120948, ENSG00000075151, ENSG00000114686, ENSG00000117751, ENSG00000083520, ENSG00000139343, ENSG00000162396, ENSG00000087302, ENSG00000125944, ENSG00000183431, ENSG00000051596, ENSG00000131914, ENSG00000188529, ENSG00000092847, ENSG00000172062, ENSG00000153201, ENSG00000105202, ENSG00000198492, ENSG00000130764, ENSG0000…	895	547	16881	1.37927	1	1	1
GOTERM_MF_DIRECT	GO:0003713	transcription coactivator activity	21	1.84049	0.0399359	ENSG00000214114, ENSG00000028839, ENSG00000105204, ENSG00000113649, ENSG00000162419, ENSG00000179222, ENSG00000115966, ENSG00000117713, ENSG00000177606, ENSG00000173801, ENSG00000186350, ENSG00000112282, ENSG00000120656, ENSG00000186260, ENSG00000188786, ENSG00000083544, ENSG00000187634, ENSG00000162601, ENSG00000147133, ENSG00000184634, ENSG00000054118	895	248	16881	1.59714	1	1	1
GOTERM_MF_DIRECT	GO:0003735	structural constituent of ribosome	19	1.66521	0.0481186	ENSG00000090263, ENSG00000155287, ENSG00000122140, ENSG00000198034, ENSG00000134419, ENSG00000112306, ENSG00000242485, ENSG00000116898, ENSG00000114686, ENSG00000004864, ENSG00000168028, ENSG00000053372, ENSG00000144659, ENSG00000116251, ENSG00000169100, ENSG00000186468, ENSG00000161970, ENSG00000182774, ENSG00000142676	895	222	16881	1.61427	1	1	1
GOTERM_MF_DIRECT	GO:0019205	nucleobase-containing compound kinase activity	3	0.262927	0.0492579	ENSG00000004455, ENSG00000162433, ENSG00000162368	895	7	16881	8.08348	1	1	1
GOTERM_MF_DIRECT	GO:0035198	miRNA binding	4	0.35057	0.0494816	ENSG00000131914, ENSG00000126070, ENSG00000092847, ENSG00000134698	895	16	16881	4.71536	1	1	1

## Sheet: mac_THP-1-mac_b2a
Category	Term		Count	%	PValue	Genes	List Total	Pop Hits	Pop Total	Fold Enrichment	Bonferroni	Benjamini	FDR
GOTERM_BP_DIRECT	GO:0006418	tRNA aminoacylation for protein translation	12	1.22075	1.25967e-06	ENSG00000164022, ENSG00000136628, ENSG00000117593, ENSG00000112855, ENSG00000133706, ENSG00000124802, ENSG00000247626, ENSG00000139131, ENSG00000067704, ENSG00000116874, ENSG00000065427, ENSG00000170445	775	40	16792	6.50013	0.00336771	0.00337339	0.00337339
GOTERM_BP_DIRECT	GO:0042384	cilium assembly	18	1.83113	5.42479e-05	ENSG00000096872, ENSG00000070367, ENSG00000068885, ENSG00000135315, ENSG00000139323, ENSG00000112210, ENSG00000164066, ENSG00000143951, ENSG00000166004, ENSG00000122507, ENSG00000080298, ENSG00000079335, ENSG00000100578, ENSG00000100554, ENSG00000130638, ENSG00000213186, ENSG00000165533, ENSG00000125257	775	124	16792	3.14522	0.13522	0.072638	0.072638
GOTERM_BP_DIRECT	GO:0061025	membrane fusion	7	0.712106	0.0149039	ENSG00000197959, ENSG00000215114, ENSG00000115271, ENSG00000125814, ENSG00000087470, ENSG00000104164, ENSG00000136874	775	44	16792	3.44704	1	1	1
GOTERM_BP_DIRECT	GO:0007585	respiratory gaseous exchange	6	0.610376	0.0188473	ENSG00000198162, ENSG00000151617, ENSG00000033170, ENSG00000153802, ENSG00000150540, ENSG00000112893	775	34	16792	3.82361	1	1	1
GOTERM_BP_DIRECT	GO:0000082	G1/S transition of mitotic cell cycle	11	1.11902	0.0191432	ENSG00000060982, ENSG00000091651, ENSG00000115947, ENSG00000150093, ENSG00000115170, ENSG00000134480, ENSG00000146143, ENSG00000097046, ENSG00000100297, ENSG00000133101, ENSG00000151247	775	102	16792	2.33665	1	1	1
GOTERM_BP_DIRECT	GO:0016925	protein sumoylation	12	1.22075	0.0191901	ENSG00000093000, ENSG00000168116, ENSG00000118007, ENSG00000112701, ENSG00000047410, ENSG00000130726, ENSG00000165119, ENSG00000197579, ENSG00000121481, ENSG00000112200, ENSG00000115267, ENSG00000128731	775	117	16792	2.22227	1	1	1
GOTERM_BP_DIRECT	GO:1903912	negative regulation of endoplasmic reticulum stress-induced eIF2 alpha phosphorylation	3	0.305188	0.0193348	ENSG00000158092, ENSG00000102580, ENSG00000071051	775	5	16792	13.0003	1	1	1
GOTERM_BP_DIRECT	GO:0014032	neural crest cell development	4	0.406918	0.0197295	ENSG00000121039, ENSG00000128918, ENSG00000151617, ENSG00000157168	775	13	16792	6.6668	1	1	1
GOTERM_BP_DIRECT	GO:0043039	tRNA aminoacylation	3	0.305188	0.0281237	ENSG00000185418, ENSG00000117593, ENSG00000139131	775	6	16792	10.8335	1	1	1
GOTERM_BP_DIRECT	GO:2001237	negative regulation of extrinsic apoptotic signaling pathway	6	0.610376	0.0292701	ENSG00000023287, ENSG00000115170, ENSG00000138448, ENSG00000137801, ENSG00000171951, ENSG00000146247	775	38	16792	3.42112	1	1	1
GOTERM_BP_DIRECT	GO:0090141	positive regulation of mitochondrial fission	4	0.406918	0.0293161	ENSG00000100523, ENSG00000069329, ENSG00000168958, ENSG00000087470	775	15	16792	5.77789	1	1	1
GOTERM_BP_DIRECT	GO:0045184	establishment of protein localization	6	0.610376	0.0356146	ENSG00000143951, ENSG00000185420, ENSG00000130724, ENSG00000164171, ENSG00000171444, ENSG00000131871	775	40	16792	3.25006	1	1	1
GOTERM_BP_DIRECT	GO:0043951	negative regulation of cAMP-mediated signaling	3	0.305188	0.0381854	ENSG00000152270, ENSG00000112038, ENSG00000116741	775	7	16792	9.2859	1	1	1
GOTERM_BP_DIRECT	GO:0001702	gastrulation with mouth forming second	4	0.406918	0.040936	ENSG00000166225, ENSG00000115170, ENSG00000121989, ENSG00000121481	775	17	16792	5.09814	1	1	1
GOTERM_BP_DIRECT	GO:0015031	protein transport	27	2.74669	0.0439894	ENSG00000213047, ENSG00000149196, ENSG00000070367, ENSG00000076321, ENSG00000133103, ENSG00000166971, ENSG00000123106, ENSG00000053770, ENSG00000145817, ENSG00000092108, ENSG00000148943, ENSG00000034713, ENSG00000144566, ENSG00000213064, ENSG00000179331, ENSG00000074695, ENSG00000130724, ENSG00000064652, ENSG00000117724, ENSG00000169251, ENSG00000105829, ENSG00000047932, ENSG00000112210, ENSG0000…	775	395	16792	1.48104	1	1	1
GOTERM_BP_DIRECT	GO:0001841	neural tube formation	3	0.305188	0.049384	ENSG00000151151, ENSG00000101752, ENSG00000124766	775	8	16792	8.12516	1	1	1
GOTERM_BP_DIRECT	GO:0032963	collagen metabolic process	3	0.305188	0.049384	ENSG00000100644, ENSG00000090530, ENSG00000125968	775	8	16792	8.12516	1	1	1
GOTERM_BP_DIRECT	GO:0046825	regulation of protein export from nucleus	3	0.305188	0.049384	ENSG00000152332, ENSG00000047410, ENSG00000152104	775	8	16792	8.12516	1	1	1
GOTERM_BP_DIRECT	GO:0060271	cilium morphogenesis	12	1.22075	0.0497491	ENSG00000164066, ENSG00000143951, ENSG00000096872, ENSG00000080298, ENSG00000100578, ENSG00000068885, ENSG00000116747, ENSG00000100554, ENSG00000135315, ENSG00000139323, ENSG00000165533, ENSG00000112210	775	136	16792	1.9118	1	1	1
GOTERM_BP_DIRECT	GO:0016055	Wnt signaling pathway	15	1.52594	0.0509861	ENSG00000073712, ENSG00000151292, ENSG00000196781, ENSG00000069329, ENSG00000106829, ENSG00000082701, ENSG00000171444, ENSG00000166025, ENSG00000186153, ENSG00000134371, ENSG00000166164, ENSG00000118518, ENSG00000151914, ENSG00000119509, ENSG00000108100	775	187	16792	1.738	1	1	1
GOTERM_BP_DIRECT	GO:0055114	oxidation-reduction process	37	3.76399	0.0561105	ENSG00000151790, ENSG00000170271, ENSG00000164904, ENSG00000023572, ENSG00000090530, ENSG00000243156, ENSG00000064763, ENSG00000156869, ENSG00000151376, ENSG00000065615, ENSG00000142168, ENSG00000128918, ENSG00000203668, ENSG00000117791, ENSG00000117592, ENSG00000188641, ENSG00000186104, ENSG00000186205, ENSG00000107077, ENSG00000164830, ENSG00000162971, ENSG00000080819, ENSG00000178445, ENSG0000…	775	592	16792	1.35419	1	1	1
GOTERM_BP_DIRECT	GO:0006270	DNA replication initiation	5	0.508647	0.0579315	ENSG00000091651, ENSG00000115947, ENSG00000146143, ENSG00000097046, ENSG00000100297	775	32	16792	3.38548	1	1	1
GOTERM_BP_DIRECT	GO:0046677	response to antibiotic	5	0.508647	0.0579315	ENSG00000142168, ENSG00000104695, ENSG00000174891, ENSG00000125968, ENSG00000065615	775	32	16792	3.38548	1	1	1
GOTERM_BP_DIRECT	GO:0007416	synapse assembly	7	0.712106	0.0612428	ENSG00000197959, ENSG00000113209, ENSG00000152767, ENSG00000091129, ENSG00000112852, ENSG00000157168, ENSG00000146555	775	61	16792	2.48639	1	1	1
GOTERM_BP_DIRECT	GO:0032886	regulation of microtubule-based process	3	0.305188	0.0615938	ENSG00000087448, ENSG00000131504, ENSG00000082701	775	9	16792	7.22237	1	1	1
GOTERM_BP_DIRECT	GO:0035372	protein localization to microtubule	3	0.305188	0.0615938	ENSG00000138182, ENSG00000131504, ENSG00000082701	775	9	16792	7.22237	1	1	1
GOTERM_BP_DIRECT	GO:0032836	glomerular basement membrane development	3	0.305188	0.0615938	ENSG00000169031, ENSG00000081052, ENSG00000116962	775	9	16792	7.22237	1	1	1
GOTERM_BP_DIRECT	GO:0043653	mitochondrial fragmentation involved in apoptotic process	3	0.305188	0.0615938	ENSG00000069329, ENSG00000168958, ENSG00000087470	775	9	16792	7.22237	1	1	1
GOTERM_BP_DIRECT	GO:0061088	regulation of sequestering of zinc ion	3	0.305188	0.0615938	ENSG00000170385, ENSG00000162695, ENSG00000104154	775	9	16792	7.22237	1	1	1
GOTERM_BP_DIRECT	GO:0007156	homophilic cell adhesion via plasma membrane adhesion molecules	13	1.32248	0.0616778	ENSG00000150093, ENSG00000113209, ENSG00000240184, ENSG00000083857, ENSG00000112852, ENSG00000158258, ENSG00000151376, ENSG00000253305, ENSG00000253159, ENSG00000253846, ENSG00000253873, ENSG00000146555, ENSG00000165731	775	158	16792	1.78274	1	1	1
GOTERM_BP_DIRECT	GO:0006491	N-glycan processing	4	0.406918	0.062023	ENSG00000198162, ENSG00000134109, ENSG00000033170, ENSG00000112893	775	20	16792	4.33342	1	1	1
GOTERM_BP_DIRECT	GO:0006457	protein folding	14	1.42421	0.0732428	ENSG00000069345, ENSG00000112208, ENSG00000074695, ENSG00000164070, ENSG00000170584, ENSG00000023318, ENSG00000153015, ENSG00000086619, ENSG00000136770, ENSG00000151835, ENSG00000168938, ENSG00000239264, ENSG00000122642, ENSG00000166226	775	180	16792	1.68522	1	1	1
GOTERM_BP_DIRECT	GO:0033619	membrane protein proteolysis	3	0.305188	0.074698	ENSG00000144468, ENSG00000101294, ENSG00000165731	775	10	16792	6.50013	1	1	1
GOTERM_BP_DIRECT	GO:0045793	positive regulation of cell size	3	0.305188	0.074698	ENSG00000184838, ENSG00000023287, ENSG00000165731	775	10	16792	6.50013	1	1	1
GOTERM_BP_DIRECT	GO:0006983	ER overload response	3	0.305188	0.074698	ENSG00000143183, ENSG00000082701, ENSG00000131871	775	10	16792	6.50013	1	1	1
GOTERM_BP_DIRECT	GO:0051775	response to redox state	3	0.305188	0.074698	ENSG00000023572, ENSG00000197894, ENSG00000131871	775	10	16792	6.50013	1	1	1
GOTERM_BP_DIRECT	GO:0034113	heterotypic cell-cell adhesion	4	0.406918	0.0783561	ENSG00000115232, ENSG00000150093, ENSG00000138448, ENSG00000091129	775	22	16792	3.93947	1	1	1
GOTERM_BP_DIRECT	GO:0006396	RNA processing	9	0.915565	0.078789	ENSG00000138035, ENSG00000047188, ENSG00000048740, ENSG00000137996, ENSG00000165119, ENSG00000065457, ENSG00000151746, ENSG00000133687, ENSG00000111880	775	97	16792	2.01035	1	1	1
GOTERM_BP_DIRECT	GO:0042542	response to hydrogen peroxide	6	0.610376	0.0847301	ENSG00000142168, ENSG00000137074, ENSG00000104695, ENSG00000186432, ENSG00000023572, ENSG00000119508	775	51	16792	2.54907	1	1	1
GOTERM_BP_DIRECT	GO:0007229	integrin-mediated signaling pathway	9	0.915565	0.0863572	ENSG00000115232, ENSG00000073712, ENSG00000150093, ENSG00000151914, ENSG00000033170, ENSG00000138448, ENSG00000164171, ENSG00000134215, ENSG00000213949	775	99	16792	1.96974	1	1	1
GOTERM_BP_DIRECT	GO:0006887	exocytosis	8	0.813835	0.0879134	ENSG00000070367, ENSG00000069974, ENSG00000137501, ENSG00000243156, ENSG00000164506, ENSG00000148943, ENSG00000117533, ENSG00000120451	775	83	16792	2.08839	1	1	1
GOTERM_BP_DIRECT	GO:0046135	pyrimidine nucleoside catabolic process	3	0.305188	0.0885884	ENSG00000135318, ENSG00000188641, ENSG00000122643	775	11	16792	5.90921	1	1	1
GOTERM_BP_DIRECT	GO:0009312	oligosaccharide biosynthetic process	3	0.305188	0.0885884	ENSG00000169255, ENSG00000033170, ENSG00000162630	775	11	16792	5.90921	1	1	1
GOTERM_BP_DIRECT	GO:0050942	positive regulation of pigment cell differentiation	2	0.203459	0.0900648	ENSG00000104164, ENSG00000188428	775	2	16792	21.6671	1	1	1
GOTERM_BP_DIRECT	GO:0006427	histidyl-tRNA aminoacylation	2	0.203459	0.0900648	ENSG00000112855, ENSG00000170445	775	2	16792	21.6671	1	1	1
GOTERM_BP_DIRECT	GO:0042126	nitrate metabolic process	2	0.203459	0.0900648	ENSG00000117791, ENSG00000186205	775	2	16792	21.6671	1	1	1
GOTERM_BP_DIRECT	GO:0034344	regulation of type III interferon production	2	0.203459	0.0900648	ENSG00000107201, ENSG00000115267	775	2	16792	21.6671	1	1	1
GOTERM_BP_DIRECT	GO:0051410	detoxification of nitrogen compound	2	0.203459	0.0900648	ENSG00000117791, ENSG00000186205	775	2	16792	21.6671	1	1	1
GOTERM_BP_DIRECT	GO:0002543	activation of blood coagulation via clotting cascade	2	0.203459	0.0900648	ENSG00000117525, ENSG00000177119	775	2	16792	21.6671	1	1	1
GOTERM_BP_DIRECT	GO:1904211	membrane protein proteolysis involved in retrograde protein transport, ER to cytosol	2	0.203459	0.0900648	ENSG00000144468, ENSG00000101294	775	2	16792	21.6671	1	1	1
GOTERM_BP_DIRECT	GO:0036493	positive regulation of translation in response to endoplasmic reticulum stress	2	0.203459	0.0900648	ENSG00000158092, ENSG00000071051	775	2	16792	21.6671	1	1	1
GOTERM_BP_DIRECT	GO:0045727	positive regulation of translation	6	0.610376	0.0962212	ENSG00000184838, ENSG00000137801, ENSG00000124766, ENSG00000164171, ENSG00000135842, ENSG00000172239	775	53	16792	2.45288	1	1	1
GOTERM_BP_DIRECT	GO:0045880	positive regulation of smoothened signaling pathway	4	0.406918	0.0963457	ENSG00000164066, ENSG00000068885, ENSG00000146038, ENSG00000168779	775	24	16792	3.61118	1	1	1
GOTERM_BP_DIRECT	GO:0043547	positive regulation of GTPase activity	34	3.4588	0.0987157	ENSG00000213047, ENSG00000186716, ENSG00000148484, ENSG00000152767, ENSG00000071051, ENSG00000082701, ENSG00000134215, ENSG00000116741, ENSG00000075391, ENSG00000173744, ENSG00000170456, ENSG00000118873, ENSG00000203668, ENSG00000145715, ENSG00000187510, ENSG00000185950, ENSG00000134909, ENSG00000090104, ENSG00000128512, ENSG00000128731, ENSG00000107863, ENSG00000150093, ENSG00000156011, ENSG0000…	775	565	16792	1.30386	1	1	1
GOTERM_CC_DIRECT	GO:0005737	cytoplasm	300	30.5188	1.23828e-07	ENSG00000174371, ENSG00000154640, ENSG00000133706, ENSG00000068885, ENSG00000137501, ENSG00000082701, ENSG00000152465, ENSG00000152104, ENSG00000128918, ENSG00000118557, ENSG00000138035, ENSG00000136891, ENSG00000115271, ENSG00000168938, ENSG00000162711, ENSG00000165309, ENSG00000183655, ENSG00000115947, ENSG00000138964, ENSG00000170584, ENSG00000047932, ENSG00000151247, ENSG00000137074, ENSG0000…	811	5222	18224	1.29094	6.45122e-05	6.45143e-05	6.42667e-05
GOTERM_CC_DIRECT	GO:0005783	endoplasmic reticulum	62	6.30722	7.45332e-05	ENSG00000143190, ENSG00000080608, ENSG00000047188, ENSG00000090530, ENSG00000198589, ENSG00000071051, ENSG00000112245, ENSG00000122729, ENSG00000163082, ENSG00000065615, ENSG00000135324, ENSG00000136770, ENSG00000182240, ENSG00000123983, ENSG00000162711, ENSG00000143198, ENSG00000129128, ENSG00000182400, ENSG00000213186, ENSG00000110218, ENSG00000102471, ENSG00000215114, ENSG00000040341, ENSG0000…	811	828	18224	1.68261	0.0380889	0.0194159	0.0193414
GOTERM_CC_DIRECT	GO:0005794	Golgi apparatus	59	6.00203	0.00111516	ENSG00000069974, ENSG00000152061, ENSG00000090530, ENSG00000198589, ENSG00000122729, ENSG00000152465, ENSG00000117533, ENSG00000123106, ENSG00000182240, ENSG00000125968, ENSG00000123983, ENSG00000034713, ENSG00000164414, ENSG00000102471, ENSG00000215114, ENSG00000257594, ENSG00000107249, ENSG00000196792, ENSG00000099139, ENSG00000074695, ENSG00000033170, ENSG00000170385, ENSG00000116711, ENSG0000…	811	863	18224	1.53626	0.44084	0.175101	0.174429
GOTERM_CC_DIRECT	GO:0005813	centrosome	34	3.4588	0.00145579	ENSG00000096872, ENSG00000068885, ENSG00000110888, ENSG00000082701, ENSG00000139323, ENSG00000054282, ENSG00000082512, ENSG00000125968, ENSG00000180628, ENSG00000101752, ENSG00000164934, ENSG00000013573, ENSG00000213186, ENSG00000143156, ENSG00000256061, ENSG00000117724, ENSG00000135315, ENSG00000156876, ENSG00000166004, ENSG00000143702, ENSG00000143207, ENSG00000083535, ENSG00000138182, ENSG0000…	811	426	18224	1.79346	0.531875	0.175101	0.174429
GOTERM_CC_DIRECT	GO:0005829	cytosol	181	18.413	0.00168043	ENSG00000073712, ENSG00000148484, ENSG00000133706, ENSG00000112208, ENSG00000133704, ENSG00000197894, ENSG00000152503, ENSG00000113810, ENSG00000038274, ENSG00000082701, ENSG00000172239, ENSG00000152465, ENSG00000135049, ENSG00000117697, ENSG00000122779, ENSG00000035687, ENSG00000128918, ENSG00000136770, ENSG00000164172, ENSG00000123989, ENSG00000185950, ENSG00000134909, ENSG00000144681, ENSG0000…	811	3315	18224	1.22692	0.583655	0.175101	0.174429
GOTERM_CC_DIRECT	GO:0005654	nucleoplasm	153	15.5646	0.00343758	ENSG00000174371, ENSG00000073712, ENSG00000143190, ENSG00000015153, ENSG00000023572, ENSG00000111875, ENSG00000133704, ENSG00000151414, ENSG00000113810, ENSG00000156304, ENSG00000152104, ENSG00000123106, ENSG00000136891, ENSG00000165264, ENSG00000023608, ENSG00000184465, ENSG00000164576, ENSG00000058729, ENSG00000164975, ENSG00000182568, ENSG00000107249, ENSG00000070214, ENSG00000091651, ENSG0000…	811	2784	18224	1.23494	0.833717	0.298497	0.297351
GOTERM_CC_DIRECT	GO:0005789	endoplasmic reticulum membrane	56	5.69685	0.00446777	ENSG00000135845, ENSG00000064763, ENSG00000163082, ENSG00000065615, ENSG00000135324, ENSG00000118873, ENSG00000185070, ENSG00000160131, ENSG00000135241, ENSG00000136770, ENSG00000145817, ENSG00000123983, ENSG00000134909, ENSG00000092108, ENSG00000143198, ENSG00000129128, ENSG00000213186, ENSG00000110218, ENSG00000149084, ENSG00000074695, ENSG00000153989, ENSG00000069943, ENSG00000026652, ENSG0000…	811	862	18224	1.45983	0.902988	0.319926	0.318698
GOTERM_CC_DIRECT	GO:0005739	mitochondrion	80	8.13835	0.0049125	ENSG00000075415, ENSG00000023572, ENSG00000197894, ENSG00000059691, ENSG00000119285, ENSG00000038274, ENSG00000082701, ENSG00000122729, ENSG00000151376, ENSG00000135049, ENSG00000137500, ENSG00000138035, ENSG00000165264, ENSG00000164933, ENSG00000186205, ENSG00000185875, ENSG00000087245, ENSG00000108064, ENSG00000015475, ENSG00000164258, ENSG00000125246, ENSG00000121486, ENSG00000102471, ENSG0000…	811	1331	18224	1.35062	0.923136	0.319926	0.318698
GOTERM_CC_DIRECT	GO:0031045	dense core granule	4	0.406918	0.0110422	ENSG00000142168, ENSG00000197969, ENSG00000171951, ENSG00000170743	811	11	18224	8.17128	0.996927	0.580958	0.578728
GOTERM_CC_DIRECT	GO:0017101	aminoacyl-tRNA synthetase multienzyme complex	3	0.305188	0.0111508	ENSG00000164022, ENSG00000136628, ENSG00000065427	811	4	18224	16.8533	0.997098	0.580958	0.578728
GOTERM_CC_DIRECT	GO:0031965	nuclear membrane	19	1.93286	0.0140516	ENSG00000127870, ENSG00000065150, ENSG00000065183, ENSG00000093000, ENSG00000023287, ENSG00000047410, ENSG00000119041, ENSG00000170385, ENSG00000196586, ENSG00000065518, ENSG00000172339, ENSG00000198929, ENSG00000136891, ENSG00000143702, ENSG00000120802, ENSG00000136770, ENSG00000139174, ENSG00000091039, ENSG00000120333	811	229	18224	1.86441	0.999372	0.665536	0.662981
GOTERM_CC_DIRECT	GO:0031514	motile cilium	9	0.915565	0.0193532	ENSG00000164066, ENSG00000096872, ENSG00000155761, ENSG00000166004, ENSG00000111834, ENSG00000100644, ENSG00000113249, ENSG00000138587, ENSG00000100592	811	76	18224	2.66104	0.999962	0.840249	0.837024
GOTERM_CC_DIRECT	GO:0005667	transcription factor complex	16	1.62767	0.0256366	ENSG00000095794, ENSG00000171681, ENSG00000068305, ENSG00000119042, ENSG00000178913, ENSG00000116679, ENSG00000117625, ENSG00000155868, ENSG00000169744, ENSG00000042429, ENSG00000080298, ENSG00000100644, ENSG00000119508, ENSG00000143162, ENSG00000048052, ENSG00000103479	811	193	18224	1.86288	0.999999	0.925706	0.922153
GOTERM_CC_DIRECT	GO:0005814	centriole	11	1.11902	0.0289458	ENSG00000100629, ENSG00000054282, ENSG00000166004, ENSG00000143702, ENSG00000100578, ENSG00000197579, ENSG00000135315, ENSG00000139323, ENSG00000156876, ENSG00000168944, ENSG00000128731	811	113	18224	2.18744	1	0.925706	0.922153
GOTERM_CC_DIRECT	GO:0031201	SNARE complex	7	0.712106	0.0294586	ENSG00000125814, ENSG00000092108, ENSG00000164506, ENSG00000105829, ENSG00000104164, ENSG00000117533, ENSG00000136874	811	53	18224	2.96787	1	0.925706	0.922153
GOTERM_CC_DIRECT	GO:0008305	integrin complex	5	0.508647	0.0301291	ENSG00000115232, ENSG00000150093, ENSG00000138448, ENSG00000164171, ENSG00000213949	811	27	18224	4.1613	1	0.925706	0.922153
GOTERM_CC_DIRECT	GO:0036064	ciliary basal body	10	1.01729	0.0302054	ENSG00000164066, ENSG00000198718, ENSG00000157869, ENSG00000100578, ENSG00000117724, ENSG00000197579, ENSG00000042317, ENSG00000139323, ENSG00000165533, ENSG00000100592	811	98	18224	2.29296	1	0.925706	0.922153
GOTERM_CC_DIRECT	GO:0016020	membrane	115	11.6989	0.0437694	ENSG00000070961, ENSG00000137501, ENSG00000198589, ENSG00000135842, ENSG00000170456, ENSG00000213949, ENSG00000138035, ENSG00000123106, ENSG00000136770, ENSG00000123983, ENSG00000143198, ENSG00000128512, ENSG00000128487, ENSG00000070214, ENSG00000091651, ENSG00000040341, ENSG00000069345, ENSG00000130724, ENSG00000138448, ENSG00000047932, ENSG00000115540, ENSG00000120802, ENSG00000085377, ENSG0000…	811	2200	18224	1.17462	1	1	0.998077
GOTERM_CC_DIRECT	GO:0000151	ubiquitin ligase complex	10	1.01729	0.0511459	ENSG00000072401, ENSG00000137692, ENSG00000042429, ENSG00000137393, ENSG00000123124, ENSG00000155827, ENSG00000197579, ENSG00000155868, ENSG00000121481, ENSG00000141665	811	108	18224	2.08065	1	1	0.998077
GOTERM_CC_DIRECT	GO:0031410	cytoplasmic vesicle	17	1.7294	0.0606323	ENSG00000096872, ENSG00000196586, ENSG00000151746, ENSG00000116711, ENSG00000152954, ENSG00000135018, ENSG00000131374, ENSG00000173744, ENSG00000142168, ENSG00000166025, ENSG00000117592, ENSG00000151914, ENSG00000101752, ENSG00000149311, ENSG00000102189, ENSG00000034713, ENSG00000106299	811	235	18224	1.62556	1	1	0.998077
GOTERM_CC_DIRECT	GO:0005634	nucleus	262	26.6531	0.0607279	ENSG00000174371, ENSG00000070961, ENSG00000143190, ENSG00000133706, ENSG00000082701, ENSG00000112200, ENSG00000152104, ENSG00000117697, ENSG00000136770, ENSG00000137185, ENSG00000023608, ENSG00000185278, ENSG00000162711, ENSG00000165309, ENSG00000108064, ENSG00000164576, ENSG00000182568, ENSG00000156017, ENSG00000128487, ENSG00000152332, ENSG00000091651, ENSG00000162714, ENSG00000115947, ENSG0000…	811	5415	18224	1.08724	1	1	0.998077
GOTERM_CC_DIRECT	GO:0014069	postsynaptic density	14	1.42421	0.067226	ENSG00000186716, ENSG00000156011, ENSG00000198785, ENSG00000151491, ENSG00000069329, ENSG00000082701, ENSG00000158258, ENSG00000047932, ENSG00000152377, ENSG00000197959, ENSG00000171208, ENSG00000134909, ENSG00000101752, ENSG00000148943	811	184	18224	1.70975	1	1	0.998077
GOTERM_CC_DIRECT	GO:0032040	small-subunit processome	5	0.508647	0.0682461	ENSG00000065183, ENSG00000111615, ENSG00000134987, ENSG00000119285, ENSG00000164934	811	35	18224	3.21015	1	1	0.998077
GOTERM_CC_DIRECT	GO:0031463	Cul3-RING ubiquitin ligase complex	7	0.712106	0.0767563	ENSG00000087448, ENSG00000179454, ENSG00000174842, ENSG00000076321, ENSG00000119771, ENSG00000183655, ENSG00000170852	811	67	18224	2.34772	1	1	0.998077
GOTERM_CC_DIRECT	GO:0005793	endoplasmic reticulum-Golgi intermediate compartment	7	0.712106	0.0811903	ENSG00000074695, ENSG00000100522, ENSG00000174136, ENSG00000023318, ENSG00000102595, ENSG00000136874, ENSG00000171853	811	68	18224	2.31319	1	1	0.998077
GOTERM_CC_DIRECT	GO:0030686	90S preribosome	3	0.305188	0.0831887	ENSG00000184220, ENSG00000151304, ENSG00000119285	811	11	18224	6.12846	1	1	0.998077
GOTERM_CC_DIRECT	GO:0016591	DNA-directed RNA polymerase II, holoenzyme	3	0.305188	0.0831887	ENSG00000255529, ENSG00000196586, ENSG00000122484	811	11	18224	6.12846	1	1	0.998077
GOTERM_CC_DIRECT	GO:0034665	integrin alpha1-beta1 complex	2	0.203459	0.0869206	ENSG00000150093, ENSG00000213949	811	2	18224	22.471	1	1	0.998077
GOTERM_CC_DIRECT	GO:0016023	cytoplasmic, membrane-bounded vesicle	11	1.11902	0.0878444	ENSG00000096872, ENSG00000117592, ENSG00000151914, ENSG00000196586, ENSG00000149311, ENSG00000116711, ENSG00000152954, ENSG00000162695, ENSG00000104154, ENSG00000106299, ENSG00000173744	811	138	18224	1.79117	1	1	0.998077
GOTERM_CC_DIRECT	GO:0005777	peroxisome	9	0.915565	0.0916457	ENSG00000142168, ENSG00000135241, ENSG00000117791, ENSG00000117528, ENSG00000064763, ENSG00000168958, ENSG00000215193, ENSG00000087470, ENSG00000242110	811	104	18224	1.94461	1	1	0.998077
GOTERM_CC_DIRECT	GO:0031090	organelle membrane	8	0.813835	0.0920361	ENSG00000121039, ENSG00000076258, ENSG00000166562, ENSG00000186104, ENSG00000138821, ENSG00000143198, ENSG00000129128, ENSG00000185070	811	87	18224	2.0663	1	1	0.998077
GOTERM_CC_DIRECT	GO:0071564	npBAF complex	3	0.305188	0.0969778	ENSG00000136518, ENSG00000141380, ENSG00000080503	811	12	18224	5.61776	1	1	0.998077
GOTERM_MF_DIRECT	GO:0001968	fibronectin binding	6	0.610376	0.00561191	ENSG00000115232, ENSG00000149084, ENSG00000150093, ENSG00000138448, ENSG00000146674, ENSG00000137801	766	26	16881	5.08566	0.994229	1	1
GOTERM_MF_DIRECT	GO:0001105	RNA polymerase II transcription coactivator activity	7	0.712106	0.0059344	ENSG00000186153, ENSG00000130726, ENSG00000068305, ENSG00000080503, ENSG00000124766, ENSG00000169946, ENSG00000164985	766	37	16881	4.16932	0.995713	1	1
GOTERM_MF_DIRECT	GO:0004812	aminoacyl-tRNA ligase activity	5	0.508647	0.00620758	ENSG00000117593, ENSG00000112855, ENSG00000133706, ENSG00000065427, ENSG00000170445	766	17	16881	6.48172	0.996667	1	1
GOTERM_MF_DIRECT	GO:0000049	tRNA binding	8	0.813835	0.00778058	ENSG00000164022, ENSG00000117593, ENSG00000139131, ENSG00000145331, ENSG00000067704, ENSG00000065427, ENSG00000162971, ENSG00000121486	766	51	16881	3.45692	0.999219	1	1
GOTERM_MF_DIRECT	GO:0003688	DNA replication origin binding	4	0.406918	0.0116401	ENSG00000091651, ENSG00000115947, ENSG00000013573, ENSG00000100297	766	11	16881	8.01377	0.999978	1	1
GOTERM_MF_DIRECT	GO:0016874	ligase activity	22	2.23805	0.0116737	ENSG00000127870, ENSG00000023445, ENSG00000152503, ENSG00000155827, ENSG00000197579, ENSG00000092140, ENSG00000112200, ENSG00000133135, ENSG00000122779, ENSG00000114054, ENSG00000168116, ENSG00000100814, ENSG00000143207, ENSG00000137393, ENSG00000118518, ENSG00000130726, ENSG00000123124, ENSG00000123983, ENSG00000101752, ENSG00000121481, ENSG00000165338, ENSG00000128731	766	270	16881	1.79568	0.999979	1	1
GOTERM_MF_DIRECT	GO:0005515	protein binding	429	43.6419	0.014656	ENSG00000070961, ENSG00000143190, ENSG00000103852, ENSG00000069974, ENSG00000112208, ENSG00000137501, ENSG00000082701, ENSG00000112200, ENSG00000135324, ENSG00000137500, ENSG00000136891, ENSG00000136770, ENSG00000185950, ENSG00000162711, ENSG00000108064, ENSG00000143198, ENSG00000182568, ENSG00000091651, ENSG00000162714, ENSG00000115947, ENSG00000099139, ENSG00000138964, ENSG00000170584, ENSG0000…	766	8785	16881	1.07618	0.999999	1	1
GOTERM_MF_DIRECT	GO:0003712	transcription cofactor activity	9	0.915565	0.0147085	ENSG00000169744, ENSG00000042429, ENSG00000133639, ENSG00000102710, ENSG00000157168, ENSG00000164576, ENSG00000123609, ENSG00000114166, ENSG00000152104	766	71	16881	2.79353	0.999999	1	1
GOTERM_MF_DIRECT	GO:0019960	C-X3-C chemokine binding	3	0.305188	0.0187186	ENSG00000115232, ENSG00000150093, ENSG00000138448	766	5	16881	13.2227	1	1	1
GOTERM_MF_DIRECT	GO:0098639	collagen binding involved in cell-matrix adhesion	3	0.305188	0.0187186	ENSG00000150093, ENSG00000164171, ENSG00000213949	766	5	16881	13.2227	1	1	1
GOTERM_MF_DIRECT	GO:0070628	proteasome binding	4	0.406918	0.0188594	ENSG00000116750, ENSG00000058056, ENSG00000151835, ENSG00000125968	766	13	16881	6.78088	1	1	1
GOTERM_MF_DIRECT	GO:0003682	chromatin binding	28	2.84842	0.0202463	ENSG00000136518, ENSG00000174371, ENSG00000136319, ENSG00000096872, ENSG00000111875, ENSG00000119042, ENSG00000068305, ENSG00000080503, ENSG00000106829, ENSG00000114166, ENSG00000122779, ENSG00000189298, ENSG00000187790, ENSG00000136891, ENSG00000118418, ENSG00000130726, ENSG00000108064, ENSG00000121481, ENSG00000013573, ENSG00000182568, ENSG00000047410, ENSG00000155827, ENSG00000117724, ENSG0000…	766	391	16881	1.57816	1	1	1
GOTERM_MF_DIRECT	GO:0061630	ubiquitin protein ligase activity	16	1.62767	0.0231983	ENSG00000127870, ENSG00000130725, ENSG00000135870, ENSG00000197579, ENSG00000155868, ENSG00000133874, ENSG00000133135, ENSG00000122779, ENSG00000166971, ENSG00000042429, ENSG00000100814, ENSG00000143207, ENSG00000137393, ENSG00000118518, ENSG00000123124, ENSG00000121481	766	187	16881	1.88559	1	1	1
GOTERM_MF_DIRECT	GO:0004842	ubiquitin-protein transferase activity	24	2.44151	0.0270187	ENSG00000127870, ENSG00000023445, ENSG00000072401, ENSG00000179454, ENSG00000130725, ENSG00000152503, ENSG00000155827, ENSG00000076321, ENSG00000197579, ENSG00000119771, ENSG00000092140, ENSG00000170852, ENSG00000122779, ENSG00000087448, ENSG00000143207, ENSG00000082512, ENSG00000137393, ENSG00000118518, ENSG00000130726, ENSG00000123124, ENSG00000101752, ENSG00000121481, ENSG00000165338, ENSG0000…	766	329	16881	1.60762	1	1	1
GOTERM_MF_DIRECT	GO:0005524	ATP binding	84	8.54527	0.0302749	ENSG00000186716, ENSG00000070961, ENSG00000152782, ENSG00000179941, ENSG00000151292, ENSG00000047188, ENSG00000133706, ENSG00000111877, ENSG00000133627, ENSG00000151414, ENSG00000113810, ENSG00000059691, ENSG00000082701, ENSG00000097046, ENSG00000155897, ENSG00000135241, ENSG00000139163, ENSG00000123983, ENSG00000162711, ENSG00000143153, ENSG00000013573, ENSG00000143156, ENSG00000058729, ENSG0000…	766	1495	16881	1.23825	1	1	1
GOTERM_MF_DIRECT	GO:0008093	cytoskeletal adaptor activity	4	0.406918	0.0333937	ENSG00000158092, ENSG00000071051, ENSG00000124006, ENSG00000151746	766	16	16881	5.50946	1	1	1
GOTERM_MF_DIRECT	GO:0046872	metal ion binding	111	11.292	0.0399246	ENSG00000174371, ENSG00000070961, ENSG00000023572, ENSG00000151414, ENSG00000164171, ENSG00000151376, ENSG00000112200, ENSG00000213949, ENSG00000164574, ENSG00000137185, ENSG00000123989, ENSG00000144681, ENSG00000185278, ENSG00000164576, ENSG00000164610, ENSG00000058729, ENSG00000125246, ENSG00000257594, ENSG00000107249, ENSG00000162714, ENSG00000069345, ENSG00000138448, ENSG00000065427, ENSG0000…	766	2069	16881	1.18231	1	1	1
GOTERM_MF_DIRECT	GO:0015026	coreceptor activity	5	0.508647	0.0450091	ENSG00000115232, ENSG00000150093, ENSG00000121989, ENSG00000138448, ENSG00000174136	766	30	16881	3.67298	1	1	1
GOTERM_MF_DIRECT	GO:0004028	3-chloroallyl aldehyde dehydrogenase activity	3	0.305188	0.047884	ENSG00000143149, ENSG00000128918, ENSG00000064763	766	8	16881	8.2642	1	1	1
GOTERM_MF_DIRECT	GO:0016491	oxidoreductase activity	15	1.52594	0.0711898	ENSG00000149084, ENSG00000164904, ENSG00000197894, ENSG00000243156, ENSG00000064763, ENSG00000137767, ENSG00000086619, ENSG00000186153, ENSG00000172955, ENSG00000203668, ENSG00000128918, ENSG00000143162, ENSG00000182551, ENSG00000164830, ENSG00000164039	766	200	16881	1.65284	1	1	1
GOTERM_MF_DIRECT	GO:0005385	zinc ion transmembrane transporter activity	4	0.406918	0.0752775	ENSG00000170385, ENSG00000138821, ENSG00000162695, ENSG00000104154	766	22	16881	4.00688	1	1	1
GOTERM_MF_DIRECT	GO:0003756	protein disulfide isomerase activity	4	0.406918	0.0752775	ENSG00000023572, ENSG00000239264, ENSG00000023318, ENSG00000086619	766	22	16881	4.00688	1	1	1
GOTERM_MF_DIRECT	GO:0017137	Rab GTPase binding	11	1.11902	0.0833339	ENSG00000213047, ENSG00000145348, ENSG00000203668, ENSG00000152061, ENSG00000137501, ENSG00000243156, ENSG00000151746, ENSG00000164506, ENSG00000087470, ENSG00000131374, ENSG00000118873	766	134	16881	1.80908	1	1	1
GOTERM_MF_DIRECT	GO:0001786	phosphatidylserine binding	5	0.508647	0.0849593	ENSG00000187231, ENSG00000137501, ENSG00000091039, ENSG00000137801, ENSG00000170743	766	37	16881	2.97809	1	1	1
GOTERM_MF_DIRECT	GO:0005096	GTPase activator activity	19	1.93286	0.0859276	ENSG00000107863, ENSG00000186716, ENSG00000152061, ENSG00000075884, ENSG00000127074, ENSG00000134215, ENSG00000131374, ENSG00000116741, ENSG00000075391, ENSG00000173744, ENSG00000118873, ENSG00000145348, ENSG00000203668, ENSG00000145715, ENSG00000090104, ENSG00000134909, ENSG00000164506, ENSG00000128512, ENSG00000087470	766	279	16881	1.50079	1	1	1
GOTERM_MF_DIRECT	GO:0008294	calcium- and calmodulin-responsive adenylate cyclase activity	2	0.203459	0.0885834	ENSG00000164742, ENSG00000155897	766	2	16881	22.0379	1	1	1
GOTERM_MF_DIRECT	GO:0070780	dihydrosphingosine-1-phosphate phosphatase activity	2	0.203459	0.0885834	ENSG00000126821, ENSG00000163082	766	2	16881	22.0379	1	1	1
GOTERM_MF_DIRECT	GO:0004821	histidine-tRNA ligase activity	2	0.203459	0.0885834	ENSG00000112855, ENSG00000170445	766	2	16881	22.0379	1	1	1
GOTERM_MF_DIRECT	GO:0008940	nitrate reductase activity	2	0.203459	0.0885834	ENSG00000117791, ENSG00000186205	766	2	16881	22.0379	1	1	1
GOTERM_MF_DIRECT	GO:0004386	helicase activity	8	0.813835	0.0904789	ENSG00000187790, ENSG00000178105, ENSG00000111877, ENSG00000080503, ENSG00000153922, ENSG00000013573, ENSG00000107201, ENSG00000115267	766	85	16881	2.07415	1	1	1
